# Supplementary material for: Rodent-Related Zoonotic Pathogens at the Human–Animal–Environment Interface in Qatar: A Systematic Review and Meta-Analysis
Source: MDPI journal article supplement (doi:10.3390/ijerph18115928), 2021-05-31
Supplement: s1 [file s1]

## Rodent related zoonotic pathogens at the human-animal-environmental interface in Qatar: a systematic review and meta-analysis

**Supplementary Table S3: The extracted data from the included articles**

| Authors and References                       | Study type and period                          | Study subjects                                    | Pathogens name               | Sample details (Total sample/Total positive) |         |                  |            |             | Additional information                                                                                                                |
|----------------------------------------------|------------------------------------------------|---------------------------------------------------|------------------------------|----------------------------------------------|---------|------------------|------------|-------------|---------------------------------------------------------------------------------------------------------------------------------------|
|                                              |                                                |                                                   |                              | Qatari                                       | African | South-East Asian | West Asian | Grand Total |                                                                                                                                       |
| <a href="#">Abbas et al., 2014 [1]</a>       | Cross-sectional, January 2009 to December 2010 | Human: liver and stool of hepatic abscess patient | <i>Escherichia coli</i>      |                                              |         |                  |            | 67/56       |                                                                                                                                       |
|                                              |                                                |                                                   | <i>Entamoeba histolytica</i> |                                              |         |                  |            | 67/11       |                                                                                                                                       |
| <a href="#">Abdelmaguid et al., 2019 [2]</a> | January 2016 to January 2017                   | Human: CSF of acute meningitis patients           | <i>Escherichia coli</i>      |                                              |         |                  |            | 50/2        |                                                                                                                                       |
| <a href="#">Abu-Madi et al., 2016a [3]</a>   |                                                | Non-human: chicken carcass in the retail market   | <i>Campylobacter jejuni</i>  |                                              |         |                  |            | 400/188     | <i>Campylobacter</i> contamination is associated with market management systems, especially during preparation, storage, and display. |
|                                              |                                                |                                                   | <i>Campylobacter coli</i>    |                                              |         |                  |            | 400/1       |                                                                                                                                       |
| <a href="#">Abu-Madi et al., 2017 [4]</a>    | Cross-sectional, 2012-2014                     | Human: stool of newly arrived immigrants          | <i>Entamoeba histolytica</i> |                                              | 89/1    | 646/87           |            | 735/12      |                                                                                                                                       |
|                                              |                                                |                                                   | <i>Giardia duodenalis</i>    |                                              | 89/18   | 646/105          |            | 735/105     |                                                                                                                                       |
| <a href="#">Abu-Madi et al., 2011a [5]</a>   | Cross-sectional, June 1998 to April 1999       | Non-human: stool of <i>Rattus norvegicus</i>      | <i>Hymenolepis diminuta</i>  |                                              |         |                  |            | 136/24      | Adult rats had an overall higher prevalence than juvenile rats                                                                        |
| <a href="#">Abu-Madi et al., 2005 [6]</a>    | Cross-sectional, February -April 2002 and 2003 | Non-human: stool of <i>Rattus norvegicus</i>      | <i>Hymenolepis diminuta</i>  |                                              |         |                  |            | 179/64      | The prevalence increases with age                                                                                                     |
| <a href="#">Abu-Madi et al., 2007 [7]</a>    | Cross-sectional, January to October 2005       | Non-human: stray cat stool                        | <i>Taenia</i> sp.            |                                              |         |                  |            | 824/88      |                                                                                                                                       |
|                                              |                                                |                                                   | <i>Toxascaris leonina</i>    |                                              |         |                  |            | 824/6       |                                                                                                                                       |

| Authors and References              | Study type and period                  | Study subjects                     | Pathogens name                      | Sample details (Total sample/Total positive) |         |                  |            |             | Additional information                                                                                                                                                                                       |
|-------------------------------------|----------------------------------------|------------------------------------|-------------------------------------|----------------------------------------------|---------|------------------|------------|-------------|--------------------------------------------------------------------------------------------------------------------------------------------------------------------------------------------------------------|
|                                     |                                        |                                    |                                     | Qatari                                       | African | South-East Asian | West Asian | Grand Total |                                                                                                                                                                                                              |
| Abu-Madi <i>et al.</i> , 2008a [8]  | Cross-sectional, January-October, 2006 | Non-human: stray cat stool         | <i>Taenia taeniaeformis</i>         |                                              |         |                  |            | 488/370     | The cestode prevalence is higher among adult cats than youngs.                                                                                                                                               |
| Abu-Madi <i>et al.</i> , 2010a [9]  | Cross-sectional, 2006-07               | Non-human: feral cat stool (n=658) | <i>Taenia taeniaeformis</i>         |                                              |         |                  |            | 658/485     |                                                                                                                                                                                                              |
|                                     |                                        |                                    | <i>Toxascaris leonina</i>           |                                              |         |                  |            | 658/1       |                                                                                                                                                                                                              |
| Abu-Madi <i>et al.</i> , 2011b [10] | Cross-sectional, June-September 2009   | Human: stool of residents          | <i>Giardia duodenalis</i>           |                                              | 424/11  | 1114/23          |            | 1538/34     | <i>Schistosoma</i> was in long-term resident workers, whereas other parasites were more frequent in newly arrived persons.                                                                                   |
|                                     |                                        |                                    | <i>Trichuris trichiura</i>          |                                              | 424/11  | 1114/43          |            | 1538/54     |                                                                                                                                                                                                              |
|                                     |                                        |                                    | <i>Entamoeba histolytica/dispar</i> |                                              |         |                  |            | 1538/12     |                                                                                                                                                                                                              |
|                                     |                                        |                                    | <i>Hymenolepis nana</i>             |                                              |         |                  |            | 1538/15     |                                                                                                                                                                                                              |
|                                     |                                        |                                    | <i>Taenia</i> spp.                  |                                              |         |                  |            | 1538/8      |                                                                                                                                                                                                              |
|                                     |                                        |                                    | <i>Schistosoma</i> spp.             |                                              |         |                  |            | 1538/2      |                                                                                                                                                                                                              |
| Abu-Madi <i>et al.</i> , 2016b [11] | Retrospective, 2005-2014               | Human: stool of the residents      | <i>Giardia duodenalis</i>           | 9357/67                                      | 5354/90 |                  | 4240/42    | 29286/431   | Male had a higher prevalence than females, and the Asian immigrants were more infected with <i>Giardia</i> and amoeba than the others and younger than adults.                                               |
|                                     |                                        |                                    | <i>Cryptosporidium</i> spp.         |                                              |         |                  |            | 29286/15    |                                                                                                                                                                                                              |
|                                     |                                        |                                    | <i>Entamoeba histolytica/dispar</i> | 9357/4                                       | 5354/15 |                  | 4240/5     | 29286/62    |                                                                                                                                                                                                              |
| Abu-Madi <i>et al.</i> , 2016c [12] | Cross-sectional, 2012-2014             | Human: stool of the residents      | <i>Trichuris trichiura</i>          |                                              | 261/2   | 2225/32          |            | 2486/34     | Parasite prevalence depends on the immigrants' origin. <i>Trichuris</i> and <i>Giardia</i> were more prevalent among the Asians than others, whereas other parasites were more among the African immigrants. |
|                                     |                                        |                                    | <i>Taenia</i> spp.                  |                                              | 261/1   | 2225/1           |            | 2486/2      |                                                                                                                                                                                                              |
|                                     |                                        |                                    | <i>Hymenolepis nana</i>             |                                              | 261/2   | 2225/8           |            | 2486/10     |                                                                                                                                                                                                              |
|                                     |                                        |                                    | <i>Entamoeba histolytica/dispar</i> |                                              | 261/3   | 2225/20          |            | 2486/23     |                                                                                                                                                                                                              |
|                                     |                                        |                                    | <i>Giardia duodenalis</i>           |                                              | 261/3   | 2225/56          |            | 2486/59     |                                                                                                                                                                                                              |
|                                     | Retrospective, 2005-2014               | Human: stool of the residents      | <i>Trichuris trichiura</i>          | 9357/0                                       | 5354/3  |                  | 4240/0     | 29286/97    | <i>Schistosoma</i> spp., and <i>Taenia</i> spp. were rare infections. The                                                                                                                                    |
|                                     |                                        |                                    | <i>Hymenolepis nana</i>             | 9357/1                                       | 5354/10 |                  | 4240/5     | 29286/43    |                                                                                                                                                                                                              |

| Authors and References              | Study type and period                      | Study subjects                                                  | Pathogens name                           | Sample details (Total sample/Total positive) |         |                  |            |             | Additional information                                                                                                                        |
|-------------------------------------|--------------------------------------------|-----------------------------------------------------------------|------------------------------------------|----------------------------------------------|---------|------------------|------------|-------------|-----------------------------------------------------------------------------------------------------------------------------------------------|
|                                     |                                            |                                                                 |                                          | Qatari                                       | African | South-East Asian | West Asian | Grand Total |                                                                                                                                               |
| Abu-Madi <i>et al.</i> , 2016d [13] |                                            |                                                                 | <i>Schistosoma</i> spp.                  |                                              |         |                  |            | 29286/18    | prevalence was seven times higher in males than females.                                                                                      |
|                                     |                                            |                                                                 | <i>Taenia</i> spp.                       |                                              |         |                  |            | 29286/9     |                                                                                                                                               |
| Abu-Madi <i>et al.</i> , 2008b [14] | Retrospective, 2005-2007                   | Human: hospital bases serosurvey                                | <i>Toxoplasma gondii</i>                 |                                              | 304/45  | 511/153          | 810/280    | 1625/484    | Overall, the prevalence increases with age after >45 years (41%).                                                                             |
| Abu-Madi <i>et al.</i> , 2010b [15] | Longitudinal, 2005-2008                    | Human: TORCH* patients' blood serum                             | <i>Toxoplasma gondii</i>                 |                                              | 309/129 | 608/182          | 901/247    | 1857/572    | About 22.9% of the infants were seropositive indicates that toxoplasmosis has congenital transmission; the seroprevalence increases with age. |
| Abu-Madi <i>et al.</i> , 2010c [16] | Retrospective, 2005-2008                   | Human: stool of long-term residents                             | <i>Giardia duodenalis</i>                | 3310/34                                      | 1299/16 | 3214/34          | 1385/95    | 9208/179    | Children were more susceptible to <i>G. duodenalis</i> .                                                                                      |
|                                     |                                            |                                                                 | <i>Entamoeba histolytica/dispar</i>      | 3310/4                                       | 1299/7  | 3214/15          | 1385/1     | 9208/27     |                                                                                                                                               |
|                                     |                                            |                                                                 | <i>Trichuris trichiura</i>               | 3310/0                                       | 1299/1  | 3214/44          | 1385/0     | 9208/45     |                                                                                                                                               |
|                                     |                                            |                                                                 | <i>Hymenolepis nana</i>                  | 3310/0                                       | 1299/3  | 3214/5           | 1385/1     | 9208/9      |                                                                                                                                               |
| Abu-Madi <i>et al.</i> , 2013 [17]  | Retrospective, 2005 to 2011                | Human: stool of long-term residents                             | <i>Giardia duodenalis</i>                |                                              |         |                  |            | 18563/316   |                                                                                                                                               |
|                                     |                                            |                                                                 | <i>Trichuris trichiura</i>               | 6413/0                                       | 2998/3  |                  | 2650/0     | 18563/84    |                                                                                                                                               |
|                                     |                                            |                                                                 | <i>Hymenolepis nana</i>                  | 6413/0                                       | 2998/8  |                  | 2650/16    | 18563/43    |                                                                                                                                               |
| Abu-Madi <i>et al.</i> , 2008c [18] | Cross-sectional, 2005-2006                 | Human: stool of food handlers and housemaids                    | <i>Trichuris trichiura</i>               |                                              | 258/12  | 1479/122         |            | 1737/134    | Females were more infected than males with these parasites. <i>Giardia duodenalis</i> is a synonym of <i>Giardia lamblia</i>                  |
|                                     |                                            |                                                                 | <i>Entamoeba histolytica/dispar</i>      |                                              | 258/2   | 1479/23          |            | 1737/25     |                                                                                                                                               |
|                                     |                                            |                                                                 | <i>Giardia duodenalis</i>                |                                              | 258/13  | 1479/74          |            | 1737/87     |                                                                                                                                               |
| Ahmed <i>et al.</i> , 2016 [19]     | Prospective, November 2012 to October 2013 | Human: ICU patients' blood, respiratory, urine, and body fluids | <i>Escherichia coli</i> (ESBL producing) |                                              |         |                  |            | 629/38      | <i>E. coli</i> was one of the critical ESBL producing enterobacters isolated from the ICU patients samples.                                   |

| Authors and References                       | Study type and period                        | Study subjects                                              | Pathogens name                            | Sample details (Total sample/Total positive) |         |                  |            |             | Additional information                                                                                                                      |
|----------------------------------------------|----------------------------------------------|-------------------------------------------------------------|-------------------------------------------|----------------------------------------------|---------|------------------|------------|-------------|---------------------------------------------------------------------------------------------------------------------------------------------|
|                                              |                                              |                                                             |                                           | Qatari                                       | African | South-East Asian | West Asian | Grand Total |                                                                                                                                             |
| <a href="#">Ahmedullah et al., 2018 [20]</a> | Retrospective, 2005-2012                     | Human: blood and stool of adult patients with typhoid fever | <i>Salmonella enterica</i> serotype Typhi | -/12                                         |         | -/326            |            | -/354       | Out of the 354 patients, 83.6% were males. Most of the patients (96.9%) traveled to the Indian subcontinent (93%) before they got infected. |
| <a href="#">Al Alousi et al., 2012 [21]</a>  | Retrospective, January 2002-December 2008    | Human: sputum of pulmonary TB patients                      | <i>Mycobacterium tuberculosis</i>         |                                              |         |                  |            | -/687       | A sputum culture can be a sample of choice for acid-fast bacilli detection.                                                                 |
| <a href="#">Al-Aani et al., 2014 [22]</a>    | Retrospective, January 2000 to December 2013 | Human                                                       | <i>Echinococcus granulosus</i>            | -/3                                          |         |                  |            | -/32        | Hydatid disease was confirmed patients mainly were (90.6%) non-Qatari, 25-34 years old, and predominantly (63%) male.                       |
| <a href="#">Al Jama, 2012 [23]</a>           | Retrospective, January 1998 to December 2007 | Human: surgical wound                                       | <i>Escherichia coli</i>                   |                                              |         |                  |            | 107/18      | <i>E. coli</i> can be a significant cause of infection after lower segment cesarean section                                                 |
| <a href="#">Al Marri et al., 2006 [24]</a>   | Retrospective, 1993-2000                     | Human: expatriate who seek Qatari residence                 | <i>Mycobacterium tuberculosis</i>         |                                              |         |                  |            | 32134/200   |                                                                                                                                             |
| <a href="#">Al Marri et al., 2000 [25]</a>   | Retrospective, 1980-1988                     | Human: women with breast TB                                 | <i>Mycobacterium tuberculosis</i>         |                                              |         |                  |            | 300/2       | Breast TB cases were more among the young multiparous women.                                                                                |
| <a href="#">Al Marri et al., 2002 [26]</a>   | Retrospective, January 1992-December 1996    | Human: different pediatric TB patients                      | <i>Mycobacterium tuberculosis</i>         | -/34                                         |         |                  |            | -/66        |                                                                                                                                             |
| <a href="#">Al Marri, 2012 [27]</a>          | Retrospective, January-December 1998         | Human: pulmonary TB patients                                | <i>Mycobacterium tuberculosis</i>         | -/59                                         |         |                  |            | -/306       | False tuberculin negative results can be a cause to spread TB in Qatar.                                                                     |
| <a href="#">Al Soub, et al., 2016 [28]</a>   | Case report                                  | Human: blood from a senior male American citizen            | <i>Babesia</i> sp.                        |                                              |         |                  |            | -/1         | The first human babesiosis case in Qatar.                                                                                                   |

| Authors and References                           | Study type and period                      | Study subjects                                                     | Pathogens name                          | Sample details (Total sample/Total positive) |         |                  |            |             | Additional information                                                                                                                                                                          |
|--------------------------------------------------|--------------------------------------------|--------------------------------------------------------------------|-----------------------------------------|----------------------------------------------|---------|------------------|------------|-------------|-------------------------------------------------------------------------------------------------------------------------------------------------------------------------------------------------|
|                                                  |                                            |                                                                    |                                         | Qatari                                       | African | South-East Asian | West Asian | Grand Total |                                                                                                                                                                                                 |
| <a href="#">Al-Aani et al., 2009 [29]</a>        | Case report                                | Human: meningitis                                                  | <i>Salmonella paratyphi</i>             |                                              |         |                  |            | -/1         | The patient was coinfectd with <i>Salmonella</i> in the meninges along with Hepatitis B                                                                                                         |
| <a href="#">Al-Absi et al., 2018 [30]</a>        | Cross-sectional, June 2013 to June 2016    | Human: routine serosurvey of the blood of donors                   | Hepatitis E virus                       |                                              |         |                  |            | 1049/156    | Hepatitis E seroprevalence is higher in males than females and 25 to 45 age among the blood donors.                                                                                             |
| <a href="#">Al-Baker, et al., 2018 [31]</a>      | Retrospective, March 2007 to February 2011 | Human: uveitis patients                                            | <i>Mycobacterium tuberculosis</i>       |                                              |         |                  |            | 310/45      |                                                                                                                                                                                                 |
|                                                  |                                            |                                                                    | <i>Toxoplasma</i> sp.                   |                                              |         |                  |            | 310/16      |                                                                                                                                                                                                 |
| <a href="#">Al-Dahshan et al., 2019 [32]</a>     | Cross-sectional, 2017                      | Human: stool and blood from pediatric (infant) salmonellosis cases | <i>Salmonella</i> (Type B, C, D, and E) | -/15                                         | -/15    | -/18             |            | -/89        | The identified <i>Salmonella</i> were type B 50%, C 14%, D 18%, and E 1%. Formula food can be the source of <i>Salmonella</i> infection among infants in Qatar.                                 |
| <a href="#">Alho et al., 2017 [33]</a>           | March to July 2016                         | Non-human: pet dog stool                                           | <i>Anaplasma platys</i>                 |                                              |         |                  |            | 64/1        | Among the dogs, 18.8% were positive for at least one parasite, whereas 20.6% (n=7) of cats were positive for at least one parasite. Co-infection with more than one parasite was also detected. |
|                                                  |                                            |                                                                    | <i>Babesia gibsoni</i>                  |                                              |         |                  |            | 64/1        |                                                                                                                                                                                                 |
|                                                  |                                            |                                                                    | <i>Babesia vogeli</i>                   |                                              |         |                  |            | 64/2        |                                                                                                                                                                                                 |
|                                                  |                                            | Non-human: pet cat stool                                           | <i>Babesia vogeli</i>                   |                                              |         |                  |            | 34/1        |                                                                                                                                                                                                 |
| <a href="#">Ali et al., 2019 [34]</a>            | Case report                                | Human: tuberculous pancreatitis                                    | <i>Mycobacterium tuberculosis</i>       |                                              |         |                  |            | -/1         | The first case of pancreatic TB was recorded in an Indian migrant.                                                                                                                              |
| <a href="#">Al-Jedah and Robinson, 2002 [35]</a> | Cross-sectional                            | Mixed fresh fruit Juice from local restaurants                     | <i>Escherichia coli</i>                 |                                              |         |                  |            | 10/6        | The isolated <i>E. coli</i> total bacterial counts were above the Gulf countries' standard.                                                                                                     |

| Authors and References                              | Study type and period                             | Study subjects                                        | Pathogens name                    | Sample details (Total sample/Total positive) |         |                  |            |             | Additional information                                                                                                             |
|-----------------------------------------------------|---------------------------------------------------|-------------------------------------------------------|-----------------------------------|----------------------------------------------|---------|------------------|------------|-------------|------------------------------------------------------------------------------------------------------------------------------------|
|                                                     |                                                   |                                                       |                                   | Qatari                                       | African | South-East Asian | West Asian | Grand Total |                                                                                                                                    |
| <a href="#">Al-Khal et al., 2005 [36]</a>           | Retrospective, October 2001-2003                  | Human: garments workers, tuberculin test              | <i>Mycobacterium tuberculosis</i> |                                              |         | 2774/1193        |            | 2774/1193   | The positive garment workers were mostly Indians (12.9%), Bangladeshi (38%), Nepali (46.6%), Sri Lankan (2%), and Pakistani (0.4%) |
| <a href="#">Al-Marri, 2001a [37]</a>                | Retrospective, 1983-1996                          | Human: pediatric tuberculosis                         | <i>Mycobacterium tuberculosis</i> |                                              |         |                  |            | -/144       | The annual caseload was 5-10% from 1983 to 1996. The policy of BCG vaccination would be helpful for TB control among children.     |
| <a href="#">Al-Marri, 2001b [38]</a>                | Retrospective, January 1996-December 1998         | Human: pulmonary TB                                   | <i>Mycobacterium tuberculosis</i> | -/65                                         | -/17    | -/275            | -/35       | -/406       |                                                                                                                                    |
| <a href="#">Al-Marri and Kirkpatrick, 1999 [39]</a> | Retrospective, 1983-1996                          | Human: pediatric tuberculous patients                 | <i>Mycobacterium tuberculosis</i> |                                              |         |                  |            | -/144       |                                                                                                                                    |
| <a href="#">Al-Mulla et al., 2014 [40]</a>          | Retrospective, 2004-2011                          | Human: blood from pediatric hematology/oncology cases | <i>Escherichia coli</i>           |                                              |         |                  |            | 185/7       |                                                                                                                                    |
|                                                     |                                                   |                                                       | <i>Salmonella</i> spp.            |                                              |         |                  |            | 185/3       |                                                                                                                                    |
| <a href="#">Al-Nesf et al., 2019 [41]</a>           | Retrospective, January 1997 to December 2007      | Human: patient with hemoptysis                        | <i>Mycobacterium tuberculosis</i> |                                              |         |                  |            | 102/5       |                                                                                                                                    |
| <a href="#">Al-Shaer et al., 2017 [42]</a>          | Retrospective cohort, December 2012-November 2014 | Human: sputum from pulmonary TB                       | <i>Mycobacterium tuberculosis</i> |                                              |         |                  |            | -/148       | Tuberculous patients were mainly male (85.8%) and from Asia (87%).                                                                 |

| Authors and References                          | Study type and period                                | Study subjects                                   | Pathogens name                                                                                        | Sample details (Total sample/Total positive) |         |                  |            |             | Additional information                                                                                                                                                        |
|-------------------------------------------------|------------------------------------------------------|--------------------------------------------------|-------------------------------------------------------------------------------------------------------|----------------------------------------------|---------|------------------|------------|-------------|-------------------------------------------------------------------------------------------------------------------------------------------------------------------------------|
|                                                 |                                                      |                                                  |                                                                                                       | Qatari                                       | African | South-East Asian | West Asian | Grand Total |                                                                                                                                                                               |
| <a href="#">Al-Shaer et al., 2018 [43]</a>      | Retrospective cohort, December 2012 to December 2015 | Human: sputum from pulmonary TB                  | <i>Mycobacterium tuberculosis</i>                                                                     |                                              |         |                  |            | -/103       |                                                                                                                                                                               |
| <a href="#">Alsoub and Al Alousi, 2001 [44]</a> | Retrospective, January 1992-December 1998            | Human: miliary nodules by radiograph             | <i>Mycobacterium tuberculosis</i>                                                                     | -/3                                          |         | -/26             |            | -/32        | Miliary TB is prevalent among the Indian origin patients                                                                                                                      |
| <a href="#">Al-Thani et al., 2013 [45]</a>      | Cross-sectional, June 2009-November 2009             | Human: stool from acute gastroenteritis patients | <i>Campylobacter</i> sp.                                                                              |                                              |         |                  |            | 288/3       | These bacterial infections were associated with viral infections such as norovirus, rotavirus, adenovirus, and astrovirus.                                                    |
|                                                 |                                                      |                                                  | <i>Escherichia coli</i>                                                                               |                                              |         |                  |            | 288/6       |                                                                                                                                                                               |
|                                                 |                                                      |                                                  | <i>Salmonella</i> sp.                                                                                 |                                              |         |                  |            | 288/23      |                                                                                                                                                                               |
| <a href="#">Ben Abid and Al Soub, 2018 [46]</a> | Case report                                          | Human: Indian origin resident                    | <i>Mycobacterium tuberculosis</i>                                                                     |                                              |         |                  |            | -/1         | The woman got tuberculous mastitis, who had a family history of TB                                                                                                            |
| <a href="#">Boughattas et al., 2017a [47]</a>   | Cross-sectional, March 2015 to March 2016            | Human: stool from pediatric diarrheal patients   | <i>Giardia duodenalis</i>                                                                             |                                              |         |                  |            | 580/10      | Generally, the prevalence was highest among Qatari, older children (5+ years), female children, and during the winter. <i>G. duodenalis</i> was highest among Asian children. |
|                                                 |                                                      |                                                  | <i>Cryptosporidium parvum</i>                                                                         |                                              |         |                  |            | 580/85      |                                                                                                                                                                               |
|                                                 |                                                      |                                                  | <i>Cryptosporidium hominis</i>                                                                        |                                              |         |                  |            | 580/5       |                                                                                                                                                                               |
|                                                 |                                                      |                                                  | <i>Cryptosporidium meleagridis</i>                                                                    |                                              |         |                  |            | 580/2       |                                                                                                                                                                               |
|                                                 |                                                      |                                                  | <i>Entamoeba histolytica</i>                                                                          |                                              |         |                  |            | 580/1       |                                                                                                                                                                               |
| <a href="#">Boughattas et al., 2017b [48]</a>   |                                                      | Non-human: feral cats' blood serum               | <i>Toxoplasma gondii</i>                                                                              |                                              |         |                  |            | 495/406     | Seroprevalence was higher in summer (84.5%) than winter (72.3%).                                                                                                              |
| <a href="#">Boughattas et al., 2019 [49]</a>    | Cross-sectional survey, 2012–2014                    | Human: newly arrived immigrants' stool           | <i>Cryptosporidium parvum</i><br><i>Cryptosporidium hominis</i><br><i>Cryptosporidium meleagridis</i> |                                              | 52/34   | 787/37           |            | 839/38      | The positive cases were newly arrived residents. Poor education and pit latrines users (in the country of origin) were significantly highly positive.                         |

| Authors and References             | Study type and period                       | Study subjects                                                                                           | Pathogens name                                | Sample details (Total sample/Total positive) |         |                  |            |             | Additional information                                                                              |
|------------------------------------|---------------------------------------------|----------------------------------------------------------------------------------------------------------|-----------------------------------------------|----------------------------------------------|---------|------------------|------------|-------------|-----------------------------------------------------------------------------------------------------|
|                                    |                                             |                                                                                                          |                                               | Qatari                                       | African | South-East Asian | West Asian | Grand Total |                                                                                                     |
| Chang <i>et al.</i> , 2016 [50]    | Repeat cross-sectional, 2011                | Human: stool                                                                                             | <i>Salmonella enterica</i>                    |                                              |         |                  |            | -/69        | There is a zoonotic transmission of <i>S. enterica</i> between humans and animals in Qatar.         |
|                                    |                                             | Non-human: Cattle feces and bedding                                                                      |                                               |                                              |         |                  |            | -/8         |                                                                                                     |
|                                    |                                             | Non-human: Camel carcass                                                                                 |                                               |                                              |         |                  |            | -/1         |                                                                                                     |
| Derbala <i>et al.</i> , 2015 [51]  | Retrospective, January 2006 to April 2014   | Human: Serology                                                                                          | <i>Schistosoma mansoni</i>                    |                                              |         |                  |            | 383/128     | Anti-schistosomal antibody was detected among the adults who took treatment for Hepatitis C.        |
| Dousa <i>et al.</i> , 2019 [52]    | Retrospective, January 2011-January 2015    | Human: Sputum culture and stain from pulmonary TB patients                                               | <i>Mycobacterium tuberculosis</i>             |                                              |         |                  |            | -/134       | Persons with diabetes mellitus have an increased risk of getting TB                                 |
| Dubey <i>et al.</i> , 2010 [53]    |                                             | Non-human: Sand cat, wild cat, and big cat (Chittah) tissue and serum                                    | <i>Toxoplasma gondii</i>                      |                                              |         |                  |            | 27/21       |                                                                                                     |
| Ehlayel <i>et al.</i> , 2013. [54] | Retrospective, 1998-2012                    | Human: Children with primary immunodeficiency                                                            | <i>Salmonella</i> spp.                        |                                              |         |                  |            | 131/16      | <i>Salmonella</i> recurrent infection is one of the common causes of primary immunodeficiency       |
| El-Nemr <i>et al.</i> , 2019 [55]  | Cross-sectional                             | Human and Non-human: Fresh product, hand swab, environment, and surface sample from the wholesale market | <i>Corynebacterium</i> spp.                   |                                              |         |                  |            | 105/4       | The research showed that these two bacteria could spread from the wholesale market to entire Qatar. |
|                                    |                                             |                                                                                                          | <i>Escherichia/Shigella/Enterobacter</i> spp. |                                              |         |                  |            | 105/8       |                                                                                                     |
| Eltai <i>et al.</i> , 2020a [56]   | Cross-sectional, December 2016 to July 2017 | Non-human: sheep feces                                                                                   | <i>Escherichia coli</i>                       |                                              |         |                  |            | 171/144     |                                                                                                     |



| Authors and References            | Study type and period                        | Study subjects                                      | Pathogens name                                                    | Sample details (Total sample/Total positive) |         |                  |            |             | Additional information                    |
|-----------------------------------|----------------------------------------------|-----------------------------------------------------|-------------------------------------------------------------------|----------------------------------------------|---------|------------------|------------|-------------|-------------------------------------------|
|                                   |                                              |                                                     |                                                                   | Qatari                                       | African | South-East Asian | West Asian | Grand Total |                                           |
| Eltai <i>et al.</i> , 2018a [57]  | Cross-sectional, August 2017-January 2018    | Non-human: chicken feces                            | <i>Escherichia coli</i>                                           |                                              |         |                  |            | 172/90      |                                           |
| Eltai <i>et al.</i> , 2018b [58]  | Cross-sectional, February-June 2017          | Human: children with lower UTI                      | <i>Escherichia coli</i>                                           |                                              |         |                  |            | 727/201     |                                           |
| Eltai <i>et al.</i> , 2018c [59]  | Cross-sectional, January 2015-December 2016  | Human: stool of healthy food handling workers       | <i>Escherichia coli</i>                                           |                                              |         |                  |            | 78/456      |                                           |
| Eltai <i>et al.</i> , 2020b [60]  | Cross-sectional, August 2017 to January 2018 | Human: stool of children with acute gastroenteritis | <i>Escherichia coli</i> (EPEC and EAEC)                           | 76/33                                        |         |                  |            | 175/76      |                                           |
| Farag <i>et al.</i> , 2016 [61]   | Retrospective descriptive, 2004-2012         | Human: salmonellosis cases                          | <i>Salmonella</i> spp. (Type B, C1, C2, D, E, and non-classified) | -/94                                         | -/28    | -/100            | -/47       | -/338       |                                           |
| Garcell <i>et al.</i> , 2014 [62] | Descriptive, August 2012 to May 2013         | Human: health care worker                           | <i>Mycobacterium tuberculosis</i>                                 |                                              |         |                  |            | 202/14      | No active TB, but latent TB was detected. |
| Garcell <i>et al.</i> , 2017 [63] | Longitudinal, January 2013 to December 2015  | Human: surgical site infection                      | <i>Escherichia coli</i>                                           |                                              |         |                  |            | 603/13      |                                           |
| Ghunaim <i>et al.</i> , 2015 [64] | Cross-sectional, 2005-2006                   | Human: stool of patients with severe diarrhea       | <i>Campylobacter</i> sp.                                          |                                              |         |                  |            | 26140/497   |                                           |
|                                   |                                              |                                                     | <i>Escherichia coli</i>                                           |                                              |         |                  |            | 26140/732   |                                           |
|                                   |                                              |                                                     | <i>Salmonella</i> sp.                                             |                                              |         |                  |            | 26140/2248  |                                           |
|                                   |                                              |                                                     | <i>Yersinia</i> sp.                                               |                                              |         |                  |            | 26140/732   |                                           |
| Howady <i>et al.</i> , 2003 [65]  | Retrospective, 1992-1998                     | Human: spinal TB cases                              | <i>Mycobacterium tuberculosis</i>                                 | -/7                                          |         | -/25             | -/3        | -/35        |                                           |
|                                   |                                              |                                                     | <i>Campylobacter</i> spp.                                         |                                              |         |                  |            | 126/9       |                                           |

| Authors and References             | Study type and period                                 | Study subjects                                           | Pathogens name                    | Sample details (Total sample/Total positive) |         |                  |            |             | Additional information                                                                                                                                                                                  |
|------------------------------------|-------------------------------------------------------|----------------------------------------------------------|-----------------------------------|----------------------------------------------|---------|------------------|------------|-------------|---------------------------------------------------------------------------------------------------------------------------------------------------------------------------------------------------------|
|                                    |                                                       |                                                          |                                   | Qatari                                       | African | South-East Asian | West Asian | Grand Total |                                                                                                                                                                                                         |
| Humphrey <i>et al.</i> , 2016 [66] | Prospective, 2015-2016                                | Human: stool of migrant workers with infectious diarrhea | <i>Escherichia coli</i>           |                                              |         |                  |            | 126/81      |                                                                                                                                                                                                         |
|                                    |                                                       |                                                          | <i>Salmonella</i> spp.            |                                              |         |                  |            | 128/28      |                                                                                                                                                                                                         |
|                                    |                                                       |                                                          | <i>Giardia duodenalis</i>         |                                              |         |                  |            | 128/12      | <i>Giardia duodenalis</i> is a synonym of <i>Giardia lamblia</i>                                                                                                                                        |
| Humphrey <i>et al.</i> , 2019 [67] | Retrospective cross-sectional, June 2013 to June 2016 | Human: Blood donors serum                                | Chikungunya virus                 | 200/7                                        | 977/13  | 519/46           | 296/16     | 1992/82     |                                                                                                                                                                                                         |
| Ibrahim <i>et al.</i> , 2005a [68] | Retrospective cross-sectional, June 2013 to June 2016 | Human: transbronchial biopsy patients                    | <i>Mycobacterium tuberculosis</i> |                                              |         |                  |            | 71/16       |                                                                                                                                                                                                         |
| Ibrahim <i>et al.</i> , 2009 [69]  | Prospective observational, July 2005 to June 2006     | Human: serology of Hepatitis cases of Nepali immigrants  | Hepatitis E virus                 |                                              |         |                  |            | -/86        | Hepatitis E is an imported disease in Qatar.                                                                                                                                                            |
| Ibrahim <i>et al.</i> , 2005b [70] | Retrospective, January 1996 to December 2002          | Human: pulmonary TB                                      | <i>Mycobacterium tuberculosis</i> |                                              |         |                  |            | 39/13       | Younger people are particularly affected with pleural TB.                                                                                                                                               |
| Ibrahim <i>et al.</i> , 2016 [71]  | Cross-sectional, December 2015 to January 2017 .      | Human: pulmonary TB                                      | <i>Mycobacterium tuberculosis</i> | -/5                                          |         | -/79             | -/21       | -/100       |                                                                                                                                                                                                         |
| Imam <i>et al.</i> , 2015 [72]     | Retrospective, January 2006 to December 2012          | Human: tuberculous meningitis                            | <i>Mycobacterium tuberculosis</i> | -/2                                          |         | -/67             | -/8        | -/80        | Tuberculous meningitis is an imported disease. The majority of the tuberculous meningitis patients were originated from the Indian subcontinent, such as Nepal, India, Bangladesh, Pakistan, Sri Lanka. |

| Authors and References             | Study type and period                                             | Study subjects                      | Pathogens name                              | Sample details (Total sample/Total positive) |         |                  |            |             | Additional information |
|------------------------------------|-------------------------------------------------------------------|-------------------------------------|---------------------------------------------|----------------------------------------------|---------|------------------|------------|-------------|------------------------|
|                                    |                                                                   |                                     |                                             | Qatari                                       | African | South-East Asian | West Asian | Grand Total |                        |
| Khan <i>et al.</i> , 2010 [73]     | Prospective from July 2007 to June 2008                           | Human: patients with bacteremia     | <i>Escherichia coli</i> (ESBL and Non-ESBL) |                                              |         |                  |            | 452/97      |                        |
|                                    |                                                                   |                                     | <i>Salmonella enterica</i> serotype Typhi   |                                              |         |                  |            | 452/39      |                        |
|                                    |                                                                   |                                     | <i>Salmonella</i> spp.                      |                                              |         |                  |            | 452/13      |                        |
| Khan <i>et al.</i> , 2012 [74]     | Retrospective observational, 2005-2009                            | Human: peritoneal TB                | <i>Mycobacterium tuberculosis</i>           |                                              |         |                  |            | 54/45       |                        |
| Khan <i>et al.</i> , 2013a [75]    | A hospital-based retrospective, January 2006-December 2011        | Human: adult patient with arthritis | <i>Escherichia coli</i>                     |                                              |         |                  |            | 171/6       |                        |
|                                    |                                                                   |                                     | <i>Mycobacterium tuberculosis</i>           |                                              |         |                  |            | 171/3       |                        |
| Khan <i>et al.</i> , 2013b [76]    | Observational, perspective and case-control; June 2009 – May 2010 | Human: pleural TB                   | <i>Mycobacterium tuberculosis</i>           |                                              |         |                  |            | 103/72      |                        |
| Khan <i>et al.</i> , 2017a [77]    | Retrospective, January 2009 to December 2013                      | Human: meningitis                   | <i>Escherichia coli</i>                     |                                              |         |                  |            | 110/4       |                        |
|                                    |                                                                   |                                     | <i>Salmonella</i> group B                   |                                              |         |                  |            | -/3         |                        |
|                                    |                                                                   |                                     | <i>Listeria monocytogenes</i>               |                                              |         |                  |            | -/1         |                        |
| Khan, 2017b [78]                   | Prospective descriptive, January 2004 - January 2005              | Human: tuberculous adenitis         | <i>Mycobacterium tuberculosis</i>           | -/5                                          |         | -/15             |            | -/35        |                        |
| Minisha <i>et al.</i> , 2020 [79]  | Retrospective, June 2012 to March 2013                            | Human: UTI of pregnant women        | <i>Escherichia coli</i>                     |                                              |         |                  |            | 1588/65     |                        |
| Mobayedh <i>et al.</i> , 2002 [80] | Retrospective, July 1997-June 2000                                | Human: pulmonary TB                 | <i>Mycobacterium tuberculosis</i>           |                                              |         |                  |            | 193/58      |                        |

| Authors and References                 | Study type and period                          | Study subjects                                                                                                                                                                   | Pathogens name                                                     | Sample details (Total sample/Total positive) |          |                  |            |             | Additional information                                                                      |
|----------------------------------------|------------------------------------------------|----------------------------------------------------------------------------------------------------------------------------------------------------------------------------------|--------------------------------------------------------------------|----------------------------------------------|----------|------------------|------------|-------------|---------------------------------------------------------------------------------------------|
|                                        |                                                |                                                                                                                                                                                  |                                                                    | Qatari                                       | African  | South-East Asian | West Asian | Grand Total |                                                                                             |
| Mohammed <i>et al.</i> , 2015 [81]     | Cross-sectional                                | Non-human: Sheep, cattle and camel feces; cattle and camel milk; Cattle udder; sheep, cattle, camel and chicken carcass; Cattle bedding; feed and water trough; chicken abattoir | <i>Campylobacter coli</i><br><i>Campylobacter jejuni</i>           |                                              |          |                  |            | 1158/1101   |                                                                                             |
|                                        |                                                |                                                                                                                                                                                  | <i>Escherichia coli</i> (O157: H7, O26, O45, O103, and O111, STEC) |                                              |          |                  |            | 1158/465    |                                                                                             |
| Nahman and Hammoude, 2003 [82]         | Retrospective<br>January 1996 to December 2002 | Human: synovial fluid                                                                                                                                                            | <i>Salmonella</i> sp.                                              |                                              |          |                  |            | 24/1        |                                                                                             |
| Nasrallah <i>et al.</i> , 2017 [83]    | Cross-sectional<br>June 2013 to June 2016      | Human: routine serology of blood of the donors                                                                                                                                   | Hepatitis E virus                                                  | 1138/133                                     | 1138/458 | 1002/207         | 1851/319   | 5854/1263   |                                                                                             |
| Oude Munnink <i>et al.</i> , 2020 [84] | Case report                                    | Human                                                                                                                                                                            | Rabies virus                                                       |                                              |          |                  |            | 2           | The human cases were imported from Nepal, whereas the animal cases were native Qatari cases |
|                                        |                                                | Fox                                                                                                                                                                              |                                                                    |                                              |          |                  |            | 1           |                                                                                             |
|                                        |                                                | Camel                                                                                                                                                                            |                                                                    |                                              |          |                  |            | 1           |                                                                                             |
| Royal <i>et al.</i> , 2013 [85]        | Cross-sectional<br>2005                        | Human: Serology among US army personnel                                                                                                                                          | <i>Coxiella burnetii</i>                                           |                                              |          |                  |            | 304/26      |                                                                                             |
| Shigidi <i>et al.</i> , 2010 [86]      | January 2003 to December 2007                  | Human: peritonitis cases                                                                                                                                                         | <i>Escherichia coli</i>                                            |                                              |          |                  |            | 241/2       |                                                                                             |
|                                        |                                                |                                                                                                                                                                                  | <i>Mycobacterium tuberculosis</i>                                  |                                              |          |                  |            | 241/2       |                                                                                             |

| Authors and References                 | Study type and period                              | Study subjects                                  | Pathogens name                                                                                                                                             | Sample details (Total sample/Total positive) |         |                  |            |             | Additional information                            |
|----------------------------------------|----------------------------------------------------|-------------------------------------------------|------------------------------------------------------------------------------------------------------------------------------------------------------------|----------------------------------------------|---------|------------------|------------|-------------|---------------------------------------------------|
|                                        |                                                    |                                                 |                                                                                                                                                            | Qatari                                       | African | South-East Asian | West Asian | Grand Total |                                                   |
| Szmiegielski <i>et al.</i> , 1998 [87] | Retrospective, 1987-1995                           | Human: abdominal TB                             | <i>Mycobacterium tuberculosis</i>                                                                                                                          |                                              |         |                  |            | 78/59       |                                                   |
| Thandassery <i>et al.</i> , 2014 [88]  | Case report                                        | Human: case reports of enteric fever            | <i>Salmonella enterica</i> serotype Typhi                                                                                                                  |                                              |         | -/3              |            | -/3         | All three cases were imported from Nepal          |
| Thomas <i>et al.</i> , 2017 [89]       | Retrospective, 2008-2015                           | Human: pleural effusion cases                   | <i>Mycobacterium tuberculosis</i>                                                                                                                          |                                              |         |                  |            | 401/344     |                                                   |
| Thomas, and AlGherbawe, 2014 [90]      | Case report                                        | Human: acute myeloid leukemia with pulmonary TB | <i>Mycobacterium tuberculosis</i>                                                                                                                          |                                              |         |                  |            | -/1         |                                                   |
| Uwaydah <i>et al.</i> , 1991 [91]      | Retrospective, 1 October 1989 to 30 September 1990 | Human: <i>Salmonella</i> bacteremia             | <i>Salmonella enterica</i> Serotype Typhi                                                                                                                  | -/3                                          |         | -/25             | -/1        | -/100       |                                                   |
| Weam <i>et al.</i> , 2016 [92]         | Retrospective, August 2009 to December 2012        | Human: stool of gastroenteritis cases           | <i>Campylobacter coli</i><br><i>Campylobacter fetus</i><br><i>Campylobacter jejuni</i><br><i>Campylobacter laridis</i><br><i>Campylobacter upsaliensis</i> |                                              |         |                  |            | 423/106     |                                                   |
|                                        |                                                    |                                                 | <i>Escherichia coli</i> (EPEC 2, EPEC 3, and EPEC 4)                                                                                                       |                                              |         |                  |            | 423/208     |                                                   |
|                                        |                                                    |                                                 | <i>Salmonella</i> spp.<br>(Type B, CI, C2, and D)                                                                                                          |                                              |         |                  |            | 423/109     |                                                   |
| Zaqout <i>et al.</i> , 2019 [93]       | Case report                                        | Human: Cerebral schistosomiasis                 | <i>Schistosoma mansoni</i>                                                                                                                                 |                                              |         |                  |            | -/3         | All three cases were imported from the Philipines |

| Authors and References           | Study type and period                     | Study subjects | Pathogens name                 | Sample details (Total sample/Total positive) |         |                  |            |             | Additional information |
|----------------------------------|-------------------------------------------|----------------|--------------------------------|----------------------------------------------|---------|------------------|------------|-------------|------------------------|
|                                  |                                           |                |                                | Qatari                                       | African | South-East Asian | West Asian | Grand Total |                        |
| Zowawi <i>et al.</i> , 2014 [94] | Cross-sectional<br>July 2011-January 2013 | Human sample   | <i>Escherichia coli</i> OXA-48 |                                              |         |                  |            | -/16        |                        |

\* The authors considered Bangladesh, India, and Sri Lanka from West Asia. We considered these countries as part of South Asia.

## Reference

1. Abbas MT, Khan FY, Muhsin SA, Al-Dehwe B, Abukamar M, Elzouki AN. Epidemiology, clinical features and outcome of liver abscess: A single reference center experience in Qatar. *Oman Medical Journal*. 2014;29(4):260-3. doi: 10.5001/omj.2014.69.
2. Abdelmaguid N, Seleem WS, Soliman AT, Mohamed RS, Elgharbawy FM, Yassin H, et al. Clinical presentations, laboratory analysis and linear growth in 50 neonates and young infants with acute meningitis: One year experience of a single center in Qatar. *Mediterranean Journal of Hematology and Infectious Diseases*. 2019;11(1). doi: 10.4084/MJHID.2019.028.
3. Abu-Madi M, Behnke JM, Sharma A, Bearden R, Al-Banna N. Prevalence of Virulence/Stress Genes in *Campylobacter jejuni* from Chicken Meat Sold in Qatari Retail Outlets. *PLoS One*. 2016;11(6):e0156938. Epub 2016/06/04. doi: 10.1371/journal.pone.0156938. PubMed PMID: 27258021; PubMed Central PMCID: PMC4892673.
4. Abu-Madi M, Boughattas S, Behnke JM, Sharma A, Ismail A. Coproscopy and molecular screening for detection of intestinal protozoa. *Parasites & Vectors*. 2017;10. doi: 10.1186/s13071-017-2346-7. PubMed PMID: WOS:000410690000005.
5. Abu-Madi MA, Lewis JW, Mikhail M, El-Nagger ME, Behnke JM. Monospecific helminth and arthropod infections in an urban population of brown rats from Doha, Qatar. *Journal of Helminthology*. 2001;75(4):313-20. doi: 10.1017/s0022149x01000488. PubMed PMID: WOS:000172904500003.
6. Abu-Madi MA, Behnke JM, Mikhail M, Lewis JW, Al-Kaabi ML. Parasite populations in the brown rat *Rattus norvegicus* from Doha, Qatar between years: the effect of host age, sex and density. *Journal of Helminthology*. 2005;79(2):105-11. doi: 10.1079/joh2005274. PubMed PMID: WOS:000229679500002.
7. Abu-Madi MA, Al-Ahbabi DA, Al-Mashhadani MM, Al-Ibrahim R, Pal P, Lewis JW. Patterns of parasitic infections in faecal samples from stray cat populations in Qatar. *Journal of Helminthology*. 2007;81(3):281-6. doi: 10.1017/S0022149X07818505.
8. Abu-Madi MA, Pal P, Al-Thani A, Lewis JW. Descriptive epidemiology of intestinal helminth parasites from stray cat populations in Qatar. *J Helminthol*. 2008;82(1):59-68. Epub 2008/01/18. doi: 10.1017/s0022149x07870830. PubMed PMID: 18199386.
9. Abu-Madi MA, Behnke JM, Prabhaker KS, Al-Ibrahim R, Lewis JW. Intestinal helminths of feral cat populations from urban and suburban districts of Qatar. *Vet Parasitol*. 2010;168(3-4):284-92. Epub 2009/12/25. doi: 10.1016/j.vetpar.2009.11.027. PubMed PMID: 20031329.
10. Abu-Madi MA, Behnke JM, Ismail A, Al-Olaqi N, Al-Zaher K, El-Ibrahim R. Comparison of intestinal parasitic infection in newly arrived and resident workers in Qatar. *Parasit Vectors*. 2011;4:211. Epub 2011/11/08. doi: 10.1186/1756-3305-4-211. PubMed PMID: 22053720; PubMed Central PMCID: PMC3247846.
11. Abu-Madi MA, Behnke JM, Boughattas S, Al-Thani A, Doiphode SH. A decade of intestinal protozoan epidemiology among settled immigrants in Qatar. *Bmc Infectious Diseases*. 2016;16. doi: 10.1186/s12879-016-1728-3. PubMed PMID: WOS:000380996200001.
12. Abu-Madi MA, Behnke JM, Ismail A, Boughattas S. Assessing the burden of intestinal parasites affecting newly arrived immigrants in Qatar. *Parasit Vectors*. 2016;9(1):619. Epub 2016/12/03. doi: 10.1186/s13071-016-1906-6. PubMed PMID: 27903290; PubMed Central PMCID: PMC4892673.
13. Abu-Madi MA, Behnke JM, Boughattas S, Al-Thani A, Doiphode SH, Deshmukh A. Helminth infections among long-term-residents and settled immigrants in Qatar in the decade from 2005 to 2014: temporal trends and varying prevalence among subjects from different regional origins. *Parasites & Vectors*. 2016;9. doi: 10.1186/s13071-016-1433-5. PubMed PMID: WOS:000372438900002.
14. Abu-Madi MA, Al-Molawi N, Behnke JM. Seroprevalence and epidemiological correlates of *Toxoplasma gondii* infections among patients referred for hospital-based serological testing in Doha, Qatar. *Parasit Vectors*. 2008;1(1):39. Epub 2008/10/22. doi: 10.1186/1756-3305-1-39. PubMed PMID: 18937857; PubMed Central PMCID: PMC2586624.

15. Abu-Madi MA, Behnke JM, Dabritz HA. Toxoplasma gondii seropositivity and co-infection with TORCH pathogens in high-risk patients from Qatar. *Am J Trop Med Hyg.* 2010;82(4):626-33. Epub 2010/03/30. doi: 10.4269/ajtmh.2010.09-0530. PubMed PMID: 20348511; PubMed Central PMCID: PMC2844547.
16. Abu-Madi MA, Behnke JM, Doiphode SH. Changing trends in intestinal parasitic infections among long-term-residents and settled immigrants in Qatar. *Parasites & Vectors.* 2010;3. doi: 10.1186/1756-3305-3-98. PubMed PMID: WOS:000283931300001.
17. Abu-Madi MA, Behnke JM, Doiphode SH. Intestinal parasitic infections among long-term-residents and settled immigrants in Qatar in the period 2005 to 2011. *American Journal of Tropical Medicine and Hygiene.* 2013;88(6):1185-95. doi: 10.4269/ajtmh.13-0006.
18. Abu-Madi MA, Behnke JM, Ismail A. Patterns of infection with intestinal parasites in Qatar among food handlers and housemaids from different geographical regions of origin. *Acta Trop.* 2008;106(3):213-20. Epub 2008/05/07. doi: 10.1016/j.actatropica.2008.03.010. PubMed PMID: 18457813.
19. Ahmed MAS, Bansal D, Acharya A, Elmi AA, Hamid JM, Ahmed AMS, et al. Antimicrobial susceptibility and molecular epidemiology of extended-spectrum beta-lactamase-producing Enterobacteriaceae from intensive care units at Hamad Medical Corporation, Qatar. *Antimicrobial Resistance and Infection Control.* 2016;5. doi: 10.1186/s13756-016-0103-x. PubMed PMID: WOS:000369811900001.
20. Ahmedullah H, Khan FY, Al Maslamani M, Al Soub H, Chacko K, Abu Khattab M, et al. Epidemiological and Clinical Features of Salmonella Typhi Infection Among Adult Patients in Qatar: A Hospital-based Study. *Oman Med J.* 2018;33(6):468-72. Epub 2018/11/10. doi: 10.5001/omj.2018.87. PubMed PMID: 30410688; PubMed Central PMCID: PMC6206420.
21. Al Alousi FS, Abu Khattab M, Al Soub H, Al-Khal AL, Al-Suwaidi ZD. Value of examining 3 sputum samples in the diagnosis of active pulmonary tuberculosis in qatar. *Infectious Diseases in Clinical Practice.* 2012;20(3):188-91. doi: 10.1097/IPC.0b013e318245d539.
22. Al Ani AM, Khan FY, Elzouki AN, Al Hajri M, Ibrahim W. Epidemiology of hydatid disease in Qatar: a hospital based study from 2000 to 2013. *Asian Pacific Journal of Tropical Medicine.* 2014;7:S85-S7. doi: 10.1016/s1995-7645(14)60209-1. PubMed PMID: WOS:000354433300014.
23. Al Jama FE. Risk factors for wound infection after lower segment cesarean section. *Qatar Medical Journal.* 2012;2012(2):26-31. doi: 10.5339/qmj.2012.2.9.
24. Al Marri MRHA, Al Hail L, Al Otaibi S, Al Marri ND. The time of reactivation of tuberculosis in expatriates in the State of Qatar. *Qatar Medical Journal.* 2006;15(2):21-3.
25. Al-Marri MR, Almosleh A, Almoslmani Y. Primary tuberculosis of the breast in Qatar: ten year experience and review of the literature. *Eur J Surg.* 2000;166(9):687-90. Epub 2000/10/18. doi: 10.1080/110241500750008420. PubMed PMID: 11034463.
26. Al Marri MRHA, Al Qatami M, Al Janahi M. The tuberculin skin test in children with tuberculosis in the State of Qatar. *Qatar Medical Journal.* 2002;11(1):19-22.
27. Al Marri MRHA. The tuberculin skin test in confirmed pulmonary tuberculosis in the state of Qatar: Where we stand? *Qatar Medical Journal.* 2012;2012(2):16-9. doi: 10.5339/qmj.2012.2.7.
28. Al Soub H, Al Maslamani M, Ahmedullah HS, Shawkat A, Ibrahim FA, Kanbar NA. First case of babesiosis in Qatar: Case report. *Jordan Medical Journal.* 2016;50(3):161-7. doi: 10.12816/0033487.
29. Al-Aani FK, Abusalah S, Al-Aqeedi R, Ibrahim A. Salmonella meningitis in an adult with type B viral hepatitis and an incidental schwannoma. *BMJ Case Rep.* 2009;2009. Epub 2009/01/01. doi: 10.1136/bcr.11.2008.1209. PubMed PMID: 21686413; PubMed Central PMCID: PMC27516.
30. Al-Absi ES, Al-Sadeq DW, Younis MH, Yassine HM, Abdalla OM, Mesleh AG, et al. Performance evaluation of five commercial assays in assessing seroprevalence of HEV antibodies among blood donors. *Journal of Medical Microbiology.* 2018;67(9):1302-9. doi: 10.1099/jmm.0.000807. PubMed PMID: WOS:000444186500016.
31. Al-Baker ZM, Bodaghi B, Khan SA. Clinical Patterns and Causes of Uveitis in a Referral Eye Clinic in Qatar. *Ocular Immunology and Inflammation.* 2018;26(2):249-58. doi: 10.1080/09273948.2016.1206573. PubMed PMID: WOS:000426938900015.



32. Al-Dahshan A, Elyamani R, Naja S, Chehab M, Nour M, Elmagboul E, et al. Epidemiological characteristics of a salmonella outbreak among infants in Qatar, 2017. *Qatar Med J.* 2019;2019(3):12. Epub 2019/12/11. doi: 10.5339/qmj.2019.12. PubMed PMID: 31819858; PubMed Central PMCID: PMC683746.
33. Alho AM, Lima C, Latrofa MS, Colella V, Ravagnan S, Capelli G, et al. Molecular detection of vector-borne pathogens in dogs and cats from Qatar. *Parasites & Vectors.* 2017;10. doi: 10.1186/s13071-017-2237-y. PubMed PMID: WOS:000404073800002.
34. Ali M, Shaukat A, Ai-Suwaidi Z, Al-Maslamani M. Tuberculosis of Pancreas, the First Case Reported from Qatar. *International Journal of Mycobacteriology.* 2019;8(1):101-3. doi: 10.4103/ijmy.ijmy\_147\_18. PubMed PMID: WOS:000461384800017.
35. Al-Jedah JH, Robinson RK. Nutritional value and microbiological safety of fresh fruit juices sold through retail outlets in Qatar. *Pakistan Journal of Nutrition.* 2002;1(2):79-81. doi: 10.3923/pjn.2002.79.81.
36. Al-Khal AL, Bener A, Enarson DA. Tuberculosis among garment workers in an Arabian developing country: State of Qatar. *Archives of Environmental & Occupational Health.* 2005;60(6):295-8. doi: 10.3200/aeoh.60.6.295-298. PubMed PMID: WOS:000245111300004.
37. Al-Marri M. Childhood tuberculosis in the State of Qatar: the effect of a limited expatriate screening programme on the incidence of tuberculosis. *International Journal of Tuberculosis and Lung Disease.* 2001;5(9):831-7. PubMed PMID: WOS:000170809800007.
38. Al-Marri M. Pattern of mycobacterial resistance to four anti-tuberculosis drugs in pulmonary tuberculosis patients in the State of Qatar after the implementation of DOTS and a limited expatriate screening programme. *International Journal of Tuberculosis and Lung Disease.* 2001;5(12):1116-21. PubMed PMID: WOS:000172895900007.
39. Al-Marri M, Kirkpatrick MB. Erythrocyte sedimentation rate in childhood tuberculosis: is it still worthwhile? *International Journal of Tuberculosis and Lung Disease.* 2000;4(3):237-9. PubMed PMID: WOS:000085679900009.
40. Al-Mulla NA, Taj-Aldeen SJ, El Shafie S, Janahi M, Al-Nasser AA, Chandra P. Bacterial bloodstream infections and antimicrobial susceptibility pattern in pediatric hematology/oncology patients after anticancer chemotherapy. *Infect Drug Resist.* 2014;7:289-99. Epub 2014/11/15. doi: 10.2147/idr.S70486. PubMed PMID: 25395866; PubMed Central PMCID: PMC4226521.
41. Al-Nesf MA, Jerobin J, Al-Alawi AA, El-Kassim M, Mobayed H, Mohammed TRN. Etiology and outcome of hemoptysis in Qatar, a high-resource country with a large expatriate population: A retrospective study. *Qatar Medical Journal.* 2019;2019(1). doi: 10.5339/qmj.2019.1.
42. Al-Shaer MH, Mansour H, Elewa H, Salameh P, Iqbal F. Treatment outcomes of fixed-dose combination versus separate tablet regimens in pulmonary tuberculosis patients with or without diabetes in Qatar. *Bmc Infectious Diseases.* 2017;17. doi: 10.1186/s12879-017-2231-1. PubMed PMID: WOS:000397382400003.
43. Al-Shaer MH, Elewa H, Alkabab Y, Nazer LH, Heysell SK. Fixed-dose combination associated with faster time to smear conversion compared to separate tablets of anti-tuberculosis drugs in patients with poorly controlled diabetes and pulmonary tuberculosis in Qatar. *Bmc Infectious Diseases.* 2018;18. doi: 10.1186/s12879-018-3309-0. PubMed PMID: WOS:000440970600003.
44. Alsoub H, Al Alousi FS. Miliary tuberculosis in Qatar: A review of 32 adult cases. *Annals of Saudi Medicine.* 2001;21(1-2):16-20. doi: 10.5144/0256-4947.2001.16. PubMed PMID: WOS:000172208300006.
45. Al-Thani A, Baris M, Al-Lawati N, Al-Dhahry S. Characterising the aetiology of severe acute gastroenteritis among patients visiting a hospital in Qatar using real-time polymerase chain reaction. *BMC Infectious Diseases.* 2013;13(1). doi: 10.1186/1471-2334-13-329.
46. Ben Abid F, Abdel Rahman SASH. A case report of TB versus idiopathic granulomatous mastitis with erythema nodosum, reactive arthritis, cough, and headache. *Aging Male.* 2018;1-4. Epub 2018/10/09. doi: 10.1080/13685538.2018.1504915. PubMed PMID: 30293476.
47. Boughattas S, Behnke JM, Al-Ansari K, Sharma A, Abu-Alainin W, Al-Thani A, et al. Molecular Analysis of the Enteric Protozoa Associated with Acute Diarrhea in Hospitalized Children. *Frontiers in*

- Cellular and Infection Microbiology. 2017;7. doi: 10.3389/fcimb.2017.00343. PubMed PMID: WOS:000407515800001.
48. Boughattas S, Behnke J, Sharma A, Abu-Madi M. Seroprevalence of *Toxoplasma gondii* infection in feral cats in Qatar. *BMC Vet Res*. 2017;13(1):26. Epub 2017/01/20. doi: 10.1186/s12917-017-0952-4. PubMed PMID: 28100230; PubMed Central PMCID: PMC5242050.
  49. Boughattas S, Behnke JM, Al-Sadeq D, Ismail A, Abu-Madi M. *Cryptosporidium* spp., prevalence, molecular characterisation and socio-demographic risk factors among immigrants in Qatar. *Plos Neglected Tropical Diseases*. 2019;13(10). doi: 10.1371/journal.pntd.0007750. PubMed PMID: WOS:000494982700019.
  50. Chang YC, Scaria J, Ibrahim M, Doiphode S, Chang Y-F, Sultan A, et al. Distribution and factors associated with *Salmonella enterica* genotypes in a diverse population of humans and animals in Qatar using multi-locus sequence typing (MLST). *Journal of Infection and Public Health*. 2016;9(3):315-23. doi: <https://doi.org/10.1016/j.jiph.2015.10.013>.
  51. Derbala M, Elbadri ME, Amer AM, AlKaabi S, Sultan KH, Kamel YM, et al. Aspartate transaminase to platelet ratio index in hepatitis C virus and Schistosomiasis co-infection. *World J Gastroenterol*. 2015;21(46):13132-9. Epub 2015/12/18. doi: 10.3748/wjg.v21.i46.13132. PubMed PMID: 26674154; PubMed Central PMCID: PMC4674732.
  52. Dousa KM, Hamad A, Albirair M, Al Soub H, Elzouki AN, Alwakeel MI, et al. Impact of Diabetes Mellitus on the Presentation and Response to Treatment of Adults With Pulmonary Tuberculosis in Qatar. *Open Forum Infectious Diseases*. 2019;6(1). doi: 10.1093/ofid/ofy335. PubMed PMID: WOS:000460636900014.
  53. Dubey JP, Pas A, Rajendran C, Kwok OCH, Ferreira LR, Martins J, et al. Toxoplasmosis in Sand cats (*Felis margarita*) and other animals in the Breeding Centre for Endangered Arabian Wildlife in the United Arab Emirates and Al Wabra Wildlife Preservation, the State of Qatar. *Veterinary Parasitology*. 2010;172(3):195-203. doi: <https://doi.org/10.1016/j.vetpar.2010.05.013>.
  54. Ehlayel MS, Bener A, Laban MA. Primary immunodeficiency diseases in children: 15 year experience in a tertiary care medical center in Qatar. *J Clin Immunol*. 2013;33(2):317-24. Epub 2012/10/12. doi: 10.1007/s10875-012-9812-y. PubMed PMID: 23054346.
  55. El-Nemr IM, Mushtaha M, Sundararaju S, Fontejon C, Suleiman M, Tang P, et al. Application of MALDI Biotyper System for Rapid Identification of Bacteria Isolated from a Fresh Produce Market. *Current Microbiology*. 2019;76(3):290-6. doi: 10.1007/s00284-018-01624-1.
  56. Eltai N, Al Thani AA, Al-Hadidi SH, Abdfarag EA, Al-Romaihi H, Mahmoud MH, et al. Antibiotic resistance profile of commensal *Escherichia coli* isolated from healthy sheep in Qatar. *J Infect Dev Ctries*. 2020;14(2):138-45. Epub 2020/03/09. doi: 10.3855/jidc.11827. PubMed PMID: 32146447.
  57. Eltai NO, Abdfarag EA, Al-Romaihi H, Wehedy E, Mahmoud MH, Alawad OK, et al. Antibiotic Resistance Profile of Commensal *Escherichia coli* Isolated from Broiler Chickens in Qatar. *J Food Prot*. 2018;81(2):302-7. Epub 2018/01/26. doi: 10.4315/0362-028x.Jfp-17-191. PubMed PMID: 29369690.
  58. Eltai NO, Al Thani AA, Al-Ansari K, Deshmukh AS, Wehedy E, Al-Hadidi SH, et al. Molecular characterization of extended spectrum beta -lactamases enterobacteriaceae causing lower urinary tract infection among pediatric population. *Antimicrobial Resistance and Infection Control*. 2018;7. doi: 10.1186/s13756-018-0381-6. PubMed PMID: WOS:000440667900002.
  59. Eltai NO, Yassine HM, Al Thani AA, Abu Madi MA, Ismail A, Ibrahim E, et al. Prevalence of antibiotic resistant *Escherichia coli* isolates from fecal samples of food handlers in Qatar. *Antimicrob Resist Infect Control*. 2018;7:78. Epub 2018/07/10. doi: 10.1186/s13756-018-0369-2. PubMed PMID: 29983931; PubMed Central PMCID: PMC6019201.
  60. Eltai NO, Al Thani AA, Al Hadidi SH, Al Ansari K, Yassine HM. Antibiotic resistance and virulence patterns of pathogenic *Escherichia coli* strains associated with acute gastroenteritis among children in Qatar. *BMC Microbiol*. 2020;20(1):54. Epub 2020/03/08. doi: 10.1186/s12866-020-01732-8. PubMed PMID: 32143566.
  61. Farag E, Garcell HG, Ganesan N, Ahmed SN, Al-Hajri M, Al Thani SM, et al. A retrospective epidemiological study on the incidence of salmonellosis in the State of Qatar during 2004-2012. *Qatar Med*

- J. 2016;2016(1):3. Epub 2016/09/16. doi: 10.5339/qmj.2016.3. PubMed PMID: 27630822; PubMed Central PMCID: PMC5009826.
62. Garcell HG, Ramirez EC, Contreras AK, Garcia FG. Latent tuberculosis infection in healthcare workers at a community hospital in Qatar. *Journal of Infection and Public Health*. 2014;7(4):356-9. doi: 10.1016/j.jiph.2014.02.001. PubMed PMID: WOS:000354963100013.
  63. Garcell HG, Arias AV, Sandoval CA, Garcia EG, Gamboa ME, Sado AB, et al. Incidence and Etiology of Surgical Site Infections in Appendectomies: A 3-Year Prospective Study. *Oman Med J*. 2017;32(1):31-5. Epub 2017/01/04. doi: 10.5001/omj.2017.06. PubMed PMID: 28042400; PubMed Central PMCID: PMC5187404.
  64. Ghunaim H, Behnke JM, Aigha I, Sharma A, Doiphode SH, Deshmukh A, et al. Analysis of resistance to antimicrobials and presence of virulence/stress response genes in *Campylobacter* isolates from patients with severe diarrhoea. *PLoS ONE*. 2015;10(3). doi: 10.1371/journal.pone.0119268.
  65. Howady FS, Al Soub H, Al Khal AL. Spinal tuberculosis in Qatar. *Qatar Medical Journal*. 2003;12(2):85-8.
  66. Humphrey JM, Ranbhise S, Ibrahim E, Al-Romaihi HE, Farag E, Abu-Raddad LJ, et al. Multiplex Polymerase Chain Reaction for Detection of Gastrointestinal Pathogens in Migrant Workers in Qatar. *Am J Trop Med Hyg*. 2016;95(6):1330-7. Epub 2016/12/09. doi: 10.4269/ajtmh.16-0464. PubMed PMID: 27928081; PubMed Central PMCID: PMC5154446.
  67. Humphrey JM, Al-Absi ES, Hamdan MM, Okasha SS, Al-Trmanini DM, El-Dous HG, et al. Dengue and chikungunya seroprevalence among Qatari nationals and immigrants residing in Qatar. *PLoS One*. 2019;14(1):e0211574. Epub 2019/02/01. doi: 10.1371/journal.pone.0211574. PubMed PMID: 30703150; PubMed Central PMCID: PMC6355019.
  68. Ibrahim AS, Allangawi MH, Sattar HA, Mobyed HS, Almohammed AA. Indications, diagnostic yields and complications of transbronchial biopsy over 5 years in the State of Qatar. *Saudi Medical Journal*. 2005;26(4):641-5. PubMed PMID: WOS:000229422200025.
  69. Ibrahim AS, Alkhal A, Jacob J, Ghadban W, Almarri A. Hepatitis E in Qatar imported by expatriate workers from Nepal: epidemiological characteristics and clinical manifestations. *J Med Virol*. 2009;81(6):1047-51. Epub 2009/04/22. doi: 10.1002/jmv.21474. PubMed PMID: 19382273.
  70. Ibrahim WH, Ghadban W, Khinji A, Yasin R, Soub H, Al-Khal AL, et al. Does pleural tuberculosis disease pattern differ among developed and developing countries. *Respiratory Medicine*. 2005;99(8):1038-45. doi: 10.1016/j.rmed.2004.12.012.
  71. Ibrahim WH, Alousi FH, Al-Khal A, Bener A, AlSalman A, Aamer A, et al. Diagnostic Delay among Adults with Pulmonary Tuberculosis in a High Gross Domestic Product Per Capita Country: Reasons and Magnitude of the Problem. *International Journal of Preventive Medicine*. 2016;7. doi: 10.4103/2008-7802.193091. PubMed PMID: WOS:000399002500003.
  72. Imam YZB, Ahmedullah HS, Akhtar N, Chacko KC, Kamran S, Al Alousi F, et al. Adult Tuberculous Meningitis in Qatar: A Descriptive Retrospective Study from its Referral Center. *European Neurology*. 2015;73(1-2):90-7. doi: 10.1159/000368894. PubMed PMID: WOS:000348410900017.
  73. Khan FY, Elshafie SS, Almaslamani M, Abu-Khattab M, El Hiday AH, Errayes M, et al. Epidemiology of bacteraemia in Hamad general hospital, Qatar: a one year hospital-based study. *Travel Med Infect Dis*. 2010;8(6):377-87. Epub 2010/11/16. doi: 10.1016/j.tmaid.2010.10.004. PubMed PMID: 21074495.
  74. Khan FY, Al-Muzrakchi AM, Elbedawi MM, Al-Muzrakchi AA, Al Tabe A. Peritoneal tuberculosis in Qatar: A five-year hospital-based study from 2005 to 2009. *Travel Medicine and Infectious Disease*. 2012;10(1):25-31. doi: 10.1016/j.tmaid.2011.12.001. PubMed PMID: WOS:000301879300003.
  75. Khan FY, Abu-Khattab M, Baagar K, Mohamed SF, Elgendy I, Anand D, et al. Characteristics of patients with definite septic arthritis at Hamad General Hospital, Qatar: A hospital-based study from 2006 to 2011. *Clinical Rheumatology*. 2013;32(7):969-73. doi: 10.1007/s10067-013-2211-9.
  76. Khan FY, Hamza M, Omran AH, Saleh M, Lingawi M, Alnaqdy A, et al. Diagnostic value of pleural fluid interferon-gamma and adenosine deaminase in patients with pleural tuberculosis in Qatar. *International Journal of General Medicine*. 2013;6:13-8. doi: 10.2147/IJGM.S39345.

77. Khan FY, Abu-Khattab M, Almaslamani EA, Hassan AA, Mohamed SF, Elbuzdi AA, et al. Acute Bacterial Meningitis in Qatar: A Hospital-Based Study from 2009 to 2013. *BioMed Research International*. 2017;2017. doi: 10.1155/2017/2975610.
78. Khan FY. Clinical pattern of tuberculous adenitis in Qatar: Experience with 35 patients. *Scandinavian Journal of Infectious Diseases*. 2009;41(2):128-34. doi: 10.1080/00365540802578991. PubMed PMID: WOS:000262417400009.
79. Minisha F, Mohamed M, Abdulmunem D, El Awad S, Zidan M, Abreo M, et al. Bacteriuria in pregnancy varies with the ambience: a retrospective observational study at a tertiary hospital in Doha, Qatar. *J Perinat Med*. 2019;48(1):46-52. Epub 2019/10/31. doi: 10.1515/jpm-2018-0419. PubMed PMID: 31665122.
80. Mobayedh HMS, Sattar HA, Ghadban WK, Al Khal AL, Al Soub H, Al Alousi FS, et al. Diagnostic value of fiberoptic bronchoscopy in suspected pulmonary tuberculosis in the state of Qatar. *Qatar Medical Journal*. 2002;11(2):39-42.
81. Mohammed HO, Stipetic K, Salem A, McDonough P, Chang YF, Sultan A. Risk of *Escherichia coli* O157:H7, Non-O157 Shiga Toxin-Producing *Escherichia coli*, and *Campylobacter* spp. in Food Animals and Their Products in Qatar. *J Food Prot*. 2015;78(10):1812-8. Epub 2015/09/27. doi: 10.4315/0362-028x.Jfp-14-596. PubMed PMID: 26408129.
82. Nahman A, Hammoudeh M. Pyogenic arthritis in Qatar. *Qatar Medical Journal*. 2003;12(1):25-7.
83. Nasrallah GK, Al Absi ES, Ghandour R, Ali NH, Taleb S, Hedaya L, et al. Seroprevalence of hepatitis E virus among blood donors in Qatar (2013-2016). *Transfusion*. 2017;57(7):1801-7. Epub 2017/04/30. doi: 10.1111/trf.14116. PubMed PMID: 28453178.
84. Oude Munnink BB, Farag EABA, GeurtsvanKessel C, Schapendonk C, van der Linden A, Kohl R, et al. First molecular analysis of rabies virus in Qatar and clinical cases imported into Qatar, a case report. *International Journal of Infectious Diseases*. 2020;96:323-6. doi: <https://doi.org/10.1016/j.ijid.2020.04.070>.
85. Royal J, Riddle MS, Mohareb E, Monteville MR, Porter CK, Faix DJ. Seroepidemiologic Survey for *Coxiella burnetii* Among US Military Personnel Deployed to Southwest and Central Asia in 2005. *American Journal of Tropical Medicine and Hygiene*. 2013;89(5):991-5. doi: 10.4269/ajtmh.12-0174. PubMed PMID: WOS:000326904100030.
86. Shigidi MM, Fituri OM, Chandy SK, Asim M, Al Malki HA, Rashed AH. Microbial spectrum and outcome of peritoneal dialysis related peritonitis in Qatar. *Saudi J Kidney Dis Transpl*. 2010;21(1):168-73. Epub 2010/01/12. PubMed PMID: 20061719.
87. Szmiegielski W, Venkataraman B, Ejeckam GC, Jarikre LN. Abdominal tuberculosis in Qatar: a clinico-radiological study. *International Journal of Tuberculosis and Lung Disease*. 1998;2(7):563-8. PubMed PMID: WOS:000074539600007.
88. Thandassery RB, Sharma M, Abdelmola A, Derbala MFM, Al Kaabi SR. Uncommon gastrointestinal complications of enteric fever in a non-endemic country. *Qatar Medical Journal*. 2014;2014(1). doi: 10.5339/qmj.2014.7.
89. Thomas M, Ibrahim WH, Raza T, Mushtaq K, Arshad A, Ahmed M, et al. Medical thoracoscopy for exudative pleural effusion: an eight-year experience from a country with a young population. *Bmc Pulmonary Medicine*. 2017;17. doi: 10.1186/s12890-017-0499-y. PubMed PMID: WOS:000416046600002.
90. Thomas M, AlGherbawe M. Acute myeloid leukemia presenting with pulmonary tuberculosis. *Case Rep Infect Dis*. 2014;2014:865909. Epub 2014/07/06. doi: 10.1155/2014/865909. PubMed PMID: 24987539; PubMed Central PMCID: PMC4058510.
91. Uwaydah AK, Matar I, Chacko KC, Davidson JC. The emergence of antimicrobial resistant *Salmonella typhi* in Qatar: epidemiology and therapeutic implications. *Transactions of the Royal Society of Tropical Medicine and Hygiene*. 1991;85(6):790-2. doi: [https://doi.org/10.1016/0035-9203\(91\)90457-A](https://doi.org/10.1016/0035-9203(91)90457-A).
92. Weam B, Abraham M, Doiphode S, Peters K, Ibrahim E, Sultan A, et al. Foodborne Bacterial Pathogens Associated with the Risk of Gastroenteritis in the State of Qatar. *Int J Health Sci (Qassim)*.

2016;10(2):197-207. Epub 2016/04/23. PubMed PMID: 27103902; PubMed Central PMCID: PMC4825893.

93. Zaqout A, Abid FB, Murshed K, Al-Bozom I, Al-Rumaihi G, Al Soub H, et al. Cerebral schistosomiasis: Case series from Qatar. *International Journal of Infectious Diseases*. 2019;86:167-70. doi: <https://doi.org/10.1016/j.ijid.2019.07.002>.

94. Zowawi HM, Sartor AL, Balkhy HH, Walsh TR, Al Johani SM, AlJindan RY, et al. Molecular characterization of carbapenemase-producing *Escherichia coli* and *Klebsiella pneumoniae* in the countries of the Gulf cooperation council: dominance of OXA-48 and NDM producers. *Antimicrob Agents Chemother*. 2014;58(6):3085-90. Epub 2014/03/19. doi: 10.1128/aac.02050-13. PubMed PMID: 24637692; PubMed Central PMCID: PMC4068443.
