# Supplementary material for: Rodent-Related Zoonotic Pathogens at the Human–Animal–Environment Interface in Qatar: A Systematic Review and Meta-Analysis
Source: MDPI journal article supplement (doi:10.3390/ijerph18115928), 2021-05-31
Supplement: s1 [file s1]

# Rodent-related zoonotic pathogens at the human-animal-environmental interface in Qatar: a systematic review and meta-analysis

**Supplementary Table S2: List of rodent-borne zoonotic diseases**

## 1 Bacterial diseases

| #  | Disease                                                          | Causal agent                                                                                                                                                                                                        | Rodent role | References |
|----|------------------------------------------------------------------|---------------------------------------------------------------------------------------------------------------------------------------------------------------------------------------------------------------------|-------------|------------|
| 1  | Bartonellosis                                                    | <i>Bartonella</i> spp. such as <i>B. doshiae</i> , <i>B. elizabethae</i> , <i>B. grahamii</i> , <i>B. rochalimae</i> , <i>B. tribocorum</i> , <i>B. vinsonii</i> subsp. <i>Arupensis</i> , and <i>B. washoensis</i> | Reservoir   | [1-5]      |
| 2  | Campylobacteriosis                                               | <i>Campylobacter</i> spp., such as <i>C. coli</i> , <i>C. fetus</i> , <i>C. hyointestinalis</i> , and <i>C. jejuni</i>                                                                                              | Carrier     | [2,3,6-9]  |
| 3  | Corynebacteriosis<br>/Non-diphtheritic<br><i>Corynebacterium</i> | <i>Corynebacterium</i> spp.                                                                                                                                                                                         | Reservoir   | [3,6]      |
| 4  | <i>E. coli</i> enteritis                                         | <i>Escherichia coli</i> 0157/VTEC                                                                                                                                                                                   | Carrier     | [2,3,9]    |
| 5  | Ehrlichiosis                                                     | <i>Ehrlichia</i> spp. such as <i>E. chaffeensis</i> , <i>E. equi</i> , <i>E. ewingii</i> , <i>E. morulae</i> , <i>E. muris</i> , <i>E. phagocytophilum</i> , <i>E. risticii</i> , and <i>E. sennetsu</i>            | Reservoir   | [1,10-12]  |
| 6  | Leptospirosis                                                    | <i>Leptospira interrogans</i>                                                                                                                                                                                       | Carrier     | [1-3]      |
| 7  | Listeriosis                                                      | <i>Listeria</i> spp. such as <i>L. monocytogenes</i> and <i>L. ivanovii</i>                                                                                                                                         | Carrier     | [2,3,13]   |
| 8  | Lyme disease                                                     | <i>Borrelia burgdorferi</i>                                                                                                                                                                                         | Reservoir   | [1-3]      |
| 9  | Pasteurellosis                                                   | <i>Pasteurella</i> spp.                                                                                                                                                                                             | Reservoir   | [3,14]     |
| 10 | Plague                                                           | <i>Yersinia pestis</i>                                                                                                                                                                                              | Carrier     | [1-3]      |
| 11 | Rickettsial Pox                                                  | <i>Rickettsia akari</i>                                                                                                                                                                                             | Reservoir   | [1-3]      |
| 12 | Q-Fever                                                          | <i>Coxiella burnetii</i>                                                                                                                                                                                            | Carrier     | [2,3]      |
| 13 | Rat-bite fever                                                   | <i>Spirillum minus</i> and <i>S. moniliformis</i>                                                                                                                                                                   | Carrier     | [2,3]      |
| 14 | Relapsing fever<br>(Tick-borne/Lice<br>borne)                    | <i>Borrelia</i> spp. such as <i>B. duttoni</i> , <i>B. hermsii</i> , <i>B. parkeri</i> , <i>B. recurrentis</i> , and <i>B. turicatae</i>                                                                            | Reservoir   | [1-3,15]   |
| 15 | Salmonellosis                                                    | <i>Salmonella</i> spp. such as <i>S. enterica</i> and <i>S. enteritidis</i>                                                                                                                                         | Reservoir   | [2,3,6,9]  |
| 16 | Japanese spotted<br>fever                                        | <i>Rickettsia japonica</i>                                                                                                                                                                                          | Reservoir   | [1]        |
| 17 | Mediterranean<br>spotted fever<br>/Boutonneuse                   | <i>Rickettsia conorii</i>                                                                                                                                                                                           | Reservoir   | [3]        |
|    | Queensland spotted<br>fever/ tick typhus                         | <i>Rickettsia australis</i>                                                                                                                                                                                         | Reservoir   | [2]        |
| 18 | Rocky mountain<br>spotted fever                                  | <i>Rickettsia rickettsi</i>                                                                                                                                                                                         | Reservoir   | [1-3]      |
| 19 | Tuberculosis                                                     | <i>Mycobacterium microti</i> , a member of <i>Mycobacterium tuberculosis</i> complex                                                                                                                                | Reservoir   | [3,16-18]  |
| 20 | Tularemia                                                        | <i>Francisella tularensis</i>                                                                                                                                                                                       | Carrier     | [1-3]      |
| 21 | Murine typhus<br>/Endemic typhus                                 | <i>Rickettsia typhi</i>                                                                                                                                                                                             | Reservoir   | [1-3]      |
| 22 | Scrub Typhus                                                     | <i>Orientia tsutsugamushi</i>                                                                                                                                                                                       | Reservoir   | [1,2]      |
| 23 | Siberian Typhus                                                  | <i>Rickettsia sibirica</i>                                                                                                                                                                                          | Reservoir   | [1]        |
| 24 | Sylvatic Typhus<br>/Epidemic thymus                              | <i>Rickettsia prowazekii</i>                                                                                                                                                                                        | Reservoir   | [1-3]      |

|    |             |                                                              |           |       |
|----|-------------|--------------------------------------------------------------|-----------|-------|
| 25 | Yersiniosis | <i>Yersinia pseudotuberculosis</i> , <i>Y. enterocolitis</i> | Reservoir | [1,3] |
|----|-------------|--------------------------------------------------------------|-----------|-------|

## 2 Fungal diseases

| # | Disease         | Causal agent                  | Rodent role | References |
|---|-----------------|-------------------------------|-------------|------------|
| 1 | Dermatophytosis | Dermatophytes fungus          | Carrier     | [1]        |
| 2 | Histoplasmosis  | <i>Histoplasma capsulatum</i> | Reservoir   | [1,19]     |
| 3 | Penicilliosis   | <i>Penicillium marneffe</i>   | Reservoir   | [1,20]     |

## 3 Parasitic diseases

| #  | Disease                                             | Causal agent (Type, name)                                                                                                                                                                                                                       | Rodent role | References  |
|----|-----------------------------------------------------|-------------------------------------------------------------------------------------------------------------------------------------------------------------------------------------------------------------------------------------------------|-------------|-------------|
| 1  | Moniliformiasis                                     | Acanthocephala, <i>Moniliformis moniliformis</i>                                                                                                                                                                                                |             | [3]         |
| 2  | Echinococcosis                                      | Cestode, <i>Echinococcus</i> spp., such as <i>E. granulosus</i> , <i>E. multilocularis</i> , <i>E. oligarthrus</i> , and <i>E. vogeli</i>                                                                                                       | Reservoir   | [1-3,21,22] |
| 3  | Hymenolepiasis                                      | Cestode, <i>Hymenolepis diminuta</i> , <i>H. nana</i> , and <i>H. microstoma</i>                                                                                                                                                                | Reservoir   | [1-3,23]    |
| 4  | Taeniasis                                           | Cestode, <i>Taenia</i> spp., such as <i>T. brauni</i> , <i>T. crassiceps</i> , <i>T. glomeratus</i> , <i>T. hydatigena</i> , <i>T. martis</i> , <i>T. pisiformis</i> , <i>T. serialis</i> , <i>T. taeniaeformis</i> , <i>Versteria mustelae</i> | Reservoir   | [2,3,24,25] |
| 5  | Aelurostrongylosis                                  | Nematode, <i>Aelurostrongylus abstrusus</i>                                                                                                                                                                                                     | Reservoir   | [2]         |
| 6  | Angiostrongyliasis                                  | Nematode, <i>Angiostrongylus cantonensis</i>                                                                                                                                                                                                    | Reservoir   | [1-3]       |
| 7  | Baylisascariasis                                    | Nematode, <i>Baylisascaris procyonis</i>                                                                                                                                                                                                        | Reservoir   | [1-3]       |
| 8  | Capillariasis                                       | Nematode, <i>Capilaria hepatica</i>                                                                                                                                                                                                             | Reservoir   | [1-3]       |
| 9  | Gongylonemiasis                                     | Nematode, <i>Gongylonema pulchrum</i>                                                                                                                                                                                                           |             | [3,26]      |
| 10 | Toxascariasis                                       | Nematode, <i>Toxascaris leonina</i>                                                                                                                                                                                                             | Reservoir   | [2,3]       |
| 11 | Trichinellosis                                      | Nematode, <i>Trichinella</i> spp., such as <i>Trichinella spiralis</i>                                                                                                                                                                          | Reservoir   | [2,3,27]    |
| 12 | Trichuriasis                                        | Nematode, <i>Trichuris</i> spp.                                                                                                                                                                                                                 |             | [3]         |
| 13 | Alariasis                                           | Trematode, <i>Alaria</i> spp., such as <i>A. alata</i> and <i>A. Americana</i>                                                                                                                                                                  | Reservoir   | [2,3,28,29] |
| 14 | Brachylaimiasis                                     | Trematode, <i>Brachylaima cribbi</i>                                                                                                                                                                                                            | Reservoir   | [2,3]       |
| 15 | Echinostomiasis                                     | Trematode, <i>Echinostoma</i> spp. such as <i>E. echinatum</i> , <i>E. japonicus</i> , <i>E. perfoliatus</i> , <i>E. cinetorchis</i> , <i>E. Hortense</i> , <i>E. ilocanum</i> , <i>E. revolutum</i> , <i>Isthmiophora melis</i>                | Reservoir   | [1-3,30-32] |
| 16 | Fascioliasis                                        | Trematode, <i>Fasciola hepatica</i> , <i>F. gigantica</i>                                                                                                                                                                                       | Reservoir   | [1-3]       |
| 17 | Plagiorchiasis                                      | Trematode, <i>Plagiorchis muris</i> , <i>P. hilippinensis</i> , <i>P. javanensis</i>                                                                                                                                                            |             | [3]         |
| 18 | Schistosomiasis                                     | Trematode, <i>Schistosoma mansoni</i>                                                                                                                                                                                                           | Reservoir   | [1-3]       |
| 19 | Amoebic dysentery                                   | Protozoa, <i>Entamoeba histolytica</i>                                                                                                                                                                                                          | Reservoir   | [2]         |
| 20 | Anaplasmosis/<br>Human granulocytic<br>anaplasmosis | Protozoa, <i>Anaplasma phagocytophilum</i>                                                                                                                                                                                                      | Reservoir   | [1-3]       |
| 21 | Babesiosis                                          | Protozoa, <i>Babesia</i> spp. such as <i>Babesia microti</i>                                                                                                                                                                                    | Reservoir   | [2,3,33]    |
| 22 | Cryptosporidiasis                                   | Protozoa, <i>Cryptosporidium</i> spp. ( <i>Cryptosporidium parvum</i> , <i>Cryptosporidium hominis</i> , <i>Cryptosporidium meleagridis</i> , <i>Cryptosporidium muris</i> )                                                                    | Reservoir   | [1-3,34,35] |

|    |                                                                 |                                                                                                                              |           |       |
|----|-----------------------------------------------------------------|------------------------------------------------------------------------------------------------------------------------------|-----------|-------|
| 23 | Giardiasis                                                      | Protozoa, <i>Giardia lamblia</i>                                                                                             | Reservoir | [1-3] |
| 24 | Leishmaniasis<br>(cutaneous,<br>mucocutaneous, and<br>visceral) | Protozoa, <i>Leishmania braziliensis</i> , <i>L. donovani</i> , <i>L. infantum</i> , <i>L. major</i> , and <i>L. tropica</i> | Reservoir | [1-3] |
| 25 | Neosporosis                                                     | Protozoa, <i>Neospora caninum</i>                                                                                            | Reservoir | [2,3] |
| 26 | Toxoplasmosis                                                   | Protozoa, <i>Toxoplasma gondii</i>                                                                                           | Reservoir | [1-3] |
| 27 | Trypanosomiasis                                                 | Protozoa, <i>Trypanosoma brucei</i> and <i>T. cruzi</i>                                                                      | Reservoir | [1-3] |

#### 4 Virus

| #  | Disease                                   | Causal agent                                            | Rodent role | References |
|----|-------------------------------------------|---------------------------------------------------------|-------------|------------|
| 1  | Argentine/Junin/Mapucho hemorrhagic fever | <i>South American arenavirus</i> , Arenaviridae         | Reservoir   | [1-3,36]   |
| 2  | Bolivian hemorrhagic fever                | <i>Machupo virus</i> , Arenaviridae                     | Reservoir   | [1,3,36]   |
| 3  | Hemorrhagic fever<br>Brazilian            | <i>Sabia virus</i> , Arenaviridae                       | Reservoir   | [3,36]     |
| 4  | Lujo Hemorrhagic fever                    | <i>Lujovirus</i> , Arenaviridae                         | Reservoir   | [3,36]     |
| 5  | Venezuelan hemorrhagic fever              | <i>Guanarito virus</i> , Arenaviridae                   | Reservoir   | [1,3,36]   |
| 6  | Lassa fever                               | Lassa virus (LASV), Arenaviridae                        | Reservoir   | [1-3,36]   |
| 7  | Lymphocytic choriomeningitis              | Lymphocytic choriomeningitis (LCMV), Arenaviridae       | Reservoir   | [1-3,36]   |
| 8  | North American arenavirus infection       | <i>North American arenavirus</i> , Arenaviridae         | Reservoir   | [2,36]     |
| 9  | Whitewater Arroyo virus infection         | Whitewater Arroyo virus (WWAV), Arenaviridae            | Reservoir   | [1,36]     |
| 10 | Borna disease                             | <i>Borna virus</i> , Bornaviridae                       | Reservoir   | [2,3]      |
| 11 | Hantavirus pulmonary syndrome             | <i>Hantavirus</i> , Hantaviridae                        | Carrier     | [1-3]      |
| 12 | Hemorrhagic fever with renal syndrome     | <i>Hantavirus</i> , Hantaviridae                        | Carrier     | [2,3]      |
| 13 | Nephropathia epidemica                    | <i>Hantavirus</i> , Hantaviridae                        | Carrier     | [2]        |
| 14 | Ebola                                     | <i>Ebola virus</i> , Filoviridae                        | Reservoir?  | [1]        |
| 15 | Apoi virus disease                        | <i>Apoi virus</i> , Flaviviridae                        | Unknown     | [2,3]      |
| 16 | Tick-borne encephalitis                   | <i>TBE virus</i> , Flaviviridae                         | Reservoir   | [1-3]      |
| 17 | Omsk hemorrhagic fever                    | <i>OHF virus</i> , Flaviviridae                         | Reservoir   | [2,3]      |
| 18 | Kyasanur forest disease                   | <i>Kyasanur forest virus</i> , Flaviviridae             | Reservoir   | [2,3]      |
| 19 | Powassan encephalitis                     | <i>Powassan virus</i> , Flaviviridae                    | Reservoir   | [1-3]      |
| 20 | West Nile fever                           | <i>West Nile virus</i> , Flaviviridae                   | Reservoir   | [1]        |
| 21 | Hepatitis E                               | <i>Orthohepevirus A</i> , Hepeviridae                   | Reservoir   | [1-3]      |
| 22 | Crimean-Congo hemorrhagic fever           | <i>CCHF virus</i> , Nairoviridae                        | Reservoir   | [1-3]      |
| 23 | Encephalitis California                   | <i>California Encephalitis virus</i> , Peribunyaviridae | Carrier     | [1]        |
| 24 | Rift Valley fever                         | <i>Phlebovirus</i> , Phenuiviridae                      | Carrier     | [1,3]      |
| 25 | Cow Pox                                   | <i>Cowpox/Vacciniavirus</i> , Poxviridae                | Reservoir   | [1-3]      |
| 26 | Monkey Pox                                | <i>Monkeypox virus</i> , Poxviridae                     | Reservoir   | [1,37]     |
| 27 | Colorado tick fever                       | <i>Caltivirus</i> , Reoviridae                          | Reservoir   | [1-3]      |

|    |                                |                                        |           |          |
|----|--------------------------------|----------------------------------------|-----------|----------|
| 28 | Rabies                         | <i>Rabies virus</i> , Rhabdoviridae    | Reservoir | [1,3,38] |
| 29 | Chikungunya                    | <i>Chikungunya virus</i> , Togaviridae | Reservoir | [1,39]   |
| 30 | Eastern Equine Encephalitis    | <i>EEE virus</i> , Togaviridae         | Reservoir | [1]      |
| 31 | Venezuelan Equine Encephalitis | <i>VEE virus</i> , Togaviridae         | Reservoir | [1-3]    |
| 32 | Western Equine Encephalitis    | <i>WEE virus</i> , Togaviridae         | Reservoir | [2,3]    |
| 33 | Mayaro                         | <i>Mayaravirus</i> , Togaviridae       | Reservoir | [1]      |

## 5 References

- Han, B.A.; Schmidt, J.P.; Bowden, S.E.; Drake, J.M. Rodent reservoirs of future zoonotic diseases. *Proceedings of the National Academy of Sciences* **2015**, *112*, 7039, doi:10.1073/pnas.1501598112.
- Meerburg, B.G.; Singleton, G.R.; Kijlstra, A. Rodent-borne diseases and their risks for public health. *Crit Rev Microbiol* **2009**, *35*, 221-270, doi:10.1080/10408410902989837.
- Rabiee, M.H.; Mahmoudi, A.; Siahsharvie, R.; Kryštufek, B.; Mostafavi, E. Rodent-borne diseases and their public health importance in Iran. *PLoS Negl Trop Dis* **2018**, *12*, e0006256, doi:10.1371/journal.pntd.0006256.
- Favacho, A.R.d.M.; Andrade, M.N.; de Oliveira, R.C.; Bonvicino, C.R.; D'Andrea, P.S.; de Lemos, E.R.S. Zoonotic Bartonella species in wild rodents in the state of Mato Grosso do Sul, Brazil. *Microbes and Infection* **2015**, *17*, 889-892, doi:<https://doi.org/10.1016/j.micinf.2015.08.014>.
- Gonçalves, L.R.; Favacho, A.R.d.M.; Roque, A.L.R.; Mendes, N.S.; Fidelis Junior, O.L.; Benevenuto, J.L.; Herrera, H.M.; Andrea, P.S.; de Lemos, E.R.S.; Machado, R.Z., et al. Association of *Bartonella* species with Wild and Synanthropic Rodents in Different Brazilian Biomes. *Applied and Environmental Microbiology* **2016**, *82*, 7154, doi:10.1128/AEM.02447-16.
- Meerburg, B.G.; Kijlstra, A. Role of rodents in transmission of Salmonella and Campylobacter. *Journal of the Science of Food and Agriculture* **2007**, *87*, 2774-2781, doi:10.1002/jsfa.3004.
- Meerburg, B.G.; Jacobs-Reitsma, W.F.; Wagenaar, J.A.; Kijlstra, A. Presence of Salmonella and Campylobacter spp. in wild small mammals on organic farms. *Applied and environmental microbiology* **2006**, *72*, 960-962, doi:10.1128/AEM.72.1.960-962.2006.
- Edmonds, P.; Patton, C.M.; Griffin, P.M.; Barrett, T.J.; Schmid, G.P.; Baker, C.N.; Lambert, M.A.; Brenner, D.J. Campylobacter hyointestinalis associated with human gastrointestinal disease in the United States. *J Clin Microbiol* **1987**, *25*, 685-691.
- Nkogwe, C.; Raletobana, J.; Stewart-Johnson, A.; Suepaul, S.; Adesiyun, A. Frequency of Detection of Escherichia coli, Salmonella spp., and Campylobacter spp. in the Faeces of Wild Rats (Rattus spp.) in Trinidad and Tobago. *Vet Med Int* **2011**, *2011*, 686923-686923, doi:10.4061/2011/686923.
- Thomas, R.J.; Dumler, J.S.; Carlyon, J.A. Current management of human granulocytic anaplasmosis, human monocytic ehrlichiosis and Ehrlichia ewingii ehrlichiosis. *Expert Rev Anti Infect Ther* **2009**, *7*, 709-722, doi:10.1586/eri.09.44.
- Kawahara, M.; Ito, T.; Suto, C.; Shibata, S.; Rikihisa, Y.; Hata, K.; Hirai, K. Comparison of *Ehrlichia muris* Strains Isolated from Wild Mice and Ticks and Serologic Survey of Humans and Animals with *E. muris* as Antigen. *J Clin Microbiol* **1999**, *37*, 1123, doi:10.1128/JCM.37.4.1123-1129.1999.
- Tominello, T.R.; Oliveira, E.R.A.; Hussain, S.S.; Elfert, A.; Wells, J.; Golden, B.; Ismail, N. Emerging Roles of Autophagy and Inflammasome in Ehrlichiosis. *Front Immunol* **2019**, *10*, 1011, doi:10.3389/fimmu.2019.01011.
- Wang, Y.; Lu, L.; Lan, R.; Salazar, J.K.; Liu, J.; Xu, J.; Ye, C. Isolation and characterization of Listeria species from rodents in natural environments in China. *Emerg Microbes Infect* **2017**, *6*, e44, doi:10.1038/emi.2017.28.

14. Scharmann, W.; Heller, A. Survival and transmissibility of *Pasteurella pneumotropica*. *Lab Anim* **2001**, *35*, 163-166, doi:10.1258/0023677011911543.
15. Dworkin, M.S.; Schwan, T.G.; Anderson, D.E., Jr.; Borchardt, S.M. Tick-borne relapsing fever. *Infect Dis Clin North Am* **2008**, *22*, 449-viii, doi:10.1016/j.idc.2008.03.006.
16. van Soolingen, D.; van der Zanden, A.G.; de Haas, P.E.; Noordhoek, G.T.; Kiers, A.; Foudraine, N.A.; Portaels, F.; Kolk, A.H.; Kremer, K.; van Embden, J.D. Diagnosis of *Mycobacterium microti* infections among humans by using novel genetic markers. *J Clin Microbiol* **1998**, *36*, 1840-1845, doi:10.1128/JCM.36.7.1840-1845.1998.
17. Behr, M.A.; Gagneux, S. 24 - The Rise and Fall of the *Mycobacterium tuberculosis* Complex. In *Genetics and Evolution of Infectious Disease*, Tibayrenc, M., Ed. Elsevier: London, 2011; <https://doi.org/10.1016/B978-0-12-384890-1.00024-8>pp. 651-667.
18. Moradi, E.; Mosavari, N.; Tebianian, M.; Tadayon, K.; Ghaderi, R.; Soleymani Babadi, K.; Mohammad Taheri, M.; Dashtipour, S.; Loni, R.; Moradi Garavand, M., et al. Pest rodents as the essential elements of *Mycobacterium bovis* controlling programs. *International Journal of Mycobacteriology* **2015**, *4*, 137, doi:<https://doi.org/10.1016/j.ijmyco.2014.09.007>.
19. Emmons, C.W.; Ashburn, L.L. Histoplasmosis in Wild Rats: Occurrence and Histopathology. *Public Health Reports (1896-1970)* **1948**, *63*, 1416-1422, doi:10.2307/4586744.
20. Cao, C.; Liang, L.; Wang, W.; Luo, H.; Huang, S.; Liu, D.; Xu, J.; Henk, D.A.; Fisher, M.C. Common reservoirs for *Penicillium marneffei* infection in humans and rodents, China. *Emerg Infect Dis* **2011**, *17*, 209-214, doi:10.3201/eid1702.100718.
21. da Silva, A.M. Human echinococcosis: a neglected disease. *Gastroenterol Res Pract* **2010**, *2010*, 583297, doi:10.1155/2010/583297.
22. Tappe, D.; Stich, A.; Frosch, M. Emergence of polycystic neotropical echinococcosis. *Emerg Infect Dis* **2008**, *14*, 292-297, doi:10.3201/eid1402.070742.
23. Macnish, M.G.; Ryan, U.M.; Behnke, J.M.; Thompson, R.C. Detection of the rodent tapeworm *Rodentolepis* (=Hymenolepis) microstoma in humans. A new zoonosis? *Int J Parasitol* **2003**, *33*, 1079-1085, doi:10.1016/s0020-7519(03)00137-1.
24. Deplazes, P.; Eichenberger, R.M.; Grimm, F. Wildlife-transmitted *Taenia* and *Versteria* cysticercosis and coenurosis in humans and other primates. *Int J Parasitol Parasites Wildl* **2019**, *9*, 342-358, doi:10.1016/j.ijppaw.2019.03.013.
25. Spickler, A.R. Taeniasis, Cysticercosis, and coenurosis. In *Date of Factsheet*, 2020.
26. da Costa Cordeiro, H.; de Vasconcelos Melo, F.T.; Giese, E.G.; Santos, J.N.D. *Gongylostrongylus* Parasites of Rodents: A Key to Species and New Data on *Gongylostrongylus neoplasticum*. *J Parasitol* **2018**, *104*, 51-59, doi:10.1645/17-3.
27. Pozio, E. World distribution of *Trichinella* spp. infections in animals and humans. *Vet Parasitol* **2007**, *149*, 3-21, doi:10.1016/j.vetpar.2007.07.002.
28. Möhl, K.; Grosse, K.; Hamedy, A.; Wüste, T.; Kabelitz, P.; Lückner, E. Biology of *Alaria* spp. and human exposition risk to *Alaria mesocercariae*-a review. *Parasitol Res* **2009**, *105*, 1-15, doi:10.1007/s00436-009-1444-7.
29. Wasiluk, A. *Alaria alata* infection - threatening yet rarely detected trematodiasis. *Journal of Laboratory Diagnostics* **2013**.
30. Hildebrand, J.; Adamczyk, M.; Laskowski, Z.; Zaleśny, G. Host-dependent morphology of *Isthmiophora melis* (Schrunk, 1788) Luhe, 1909 (Digenea, Echinostomatinae)--morphological variation vs. molecular stability. *Parasit Vectors* **2015**, *8*, 481-481, doi:10.1186/s13071-015-1095-8.
31. Toledo, R.; Esteban, J.G. An update on human echinostomiasis. *Trans R Soc Trop Med Hyg* **2016**, *110*, 37-45, doi:10.1093/trstmh/trv099.
32. Gillespie, S.H.; Pearson, R.D. Principles and practice of clinical parasitology. **2010**.
33. Bloch, E.M.; Kumar, S.; Krause, P.J. Persistence of *Babesia microti* Infection in Humans. *Pathogens* **2019**, *8*, 102, doi:10.3390/pathogens8030102.
34. García-Livia, K.; Martín-Alonso, A.; Foronda, P. Diversity of *Cryptosporidium* spp. in wild rodents from the Canary Islands, Spain. *Parasit Vectors* **2020**, *13*, 445, doi:10.1186/s13071-020-04330-9.
35. Lv, C.; Zhang, L.; Wang, R.; Jian, F.; Zhang, S.; Ning, C.; Wang, H.; Feng, C.; Wang, X.; Ren, X., et al. <em>Cryptosporidium</em> spp. in Wild, Laboratory, and Pet Rodents in China: Prevalence and Molecular Characterization. *Applied and Environmental Microbiology* **2009**, *75*, 7692, doi:10.1128/AEM.01386-09.

36. Gravinatti, M.L.; Barbosa, C.M.; Soares, R.M.; Gregori, F. Synanthropic rodents as virus reservoirs and transmitters. *Rev Soc Bras Med Trop* **2020**, *53*, e20190486, doi:10.1590/0037-8682-0486-2019.
37. Buller, R.M.L. 170 - Poxviruses. In *Infectious Diseases (Fourth Edition)*, Cohen, J., Powderly, W.G., Opal, S.M., Eds. Elsevier: 2017; <https://doi.org/10.1016/B978-0-7020-6285-8.00170-2pp>. 1452-1457.e1451.
38. Fitzpatrick, J.L.; Dyer, J.L.; Blanton, J.D.; Kuzmin, I.V.; Rupprecht, C.E. Rabies in rodents and lagomorphs in the United States, 1995-2010. *J Am Vet Med Assoc* **2014**, *245*, 333-337, doi:10.2460/javma.245.3.333.
39. Vourc'h, G.; Halos, L.; Desvars, A.; Boué, F.; Pascal, M.; Lecollinet, S.; Zientara, S.; Duval, T.; Nzonza, A.; Brémont, M. Chikungunya antibodies detected in non-human primates and rats in three Indian Ocean islands after the 2006 ChikV outbreak. *Vet Res* **2014**, *45*, 52-52, doi:10.1186/1297-9716-45-52.
